# Supplementary material
Source: ML conference proceedings conference paper supplement (https://proceedings.neurips.cc/paper_files/paper/2019/hash/0c215f194276000be6a6df6528067151-Abstract.html)
Supplement: Supplementary file [file 0c215f194276000be6a6df6528067151-Supplemental.zip]

## 459 Appendix

### 460 A Missing Proofs from Section 3

461 In this section, we prove correctness of our  $\ell_2$  Kronecker product regression algorithm. Specifically,  
 462 we prove Theorem 3.1. To prove correctness, we need to establish several facts about the leverage  
 463 scores of a Kronecker product.

464 **Proposition A.1.** *Let  $U_i \in \mathbb{R}^{n_i \times d_i}$  be an orthonormal basis for  $A_i \in \mathbb{R}^{n_i \times d_i}$ . Then  $U = \otimes_{i=1}^q U_i$   
 465 is an orthonormal basis for  $A = \otimes_{i=1}^q A_i$ .*

466 *Proof.* Note that the column norm of each column of  $U$  is the product of column norms of the  $U_i$ 's,  
 467 which are all 1. Thus  $U$  has unit norm columns. It suffices then to show that all the singular values  
 468 of  $U$  are 1 or  $-1$ , but this follows from the fact that the singular values of  $U$  are the product of  
 469 singular values of the  $U_i$ 's, which completes the proof.  $\square$

470 **Corollary A.2.** *Let  $A = \otimes_{i=1}^q A_i$ , where  $A_i \in \mathbb{R}^{n_i \times d_i}$ . Fix any  $\vec{i} = (i_1, \dots, i_q) \in [n_1] \times [n_2] \times$   
 471  $\dots \times [n_q]$ , and let  $\vec{i}$  index into a row of  $A$  in the natural way. Then the  $\vec{i}$ -th leverage score of  $A$  is  
 472 equal to  $\prod_{j=1}^q \sigma_{i_j}(A_j)$ , where  $\sigma_t(B)$  is the  $t$ -th leverage score of a matrix  $B$ .*

473 *Proof.* Note  $U = \otimes_{i=1}^q U_i$  is an orthonormal basis for  $A = \otimes_{i=1}^q A_i$  by the prior Proposition. Now  
 474 if  $U_{\vec{i},*}$  is the  $\vec{i}$ -th row of  $U$ , then by fundamental properties of Kronecker products [VL00], we have  
 475  $\|U_{\vec{i},*}\|_2 = \prod_{j=1}^q \|(U_j)_{i_j,*}\|_2$ , which completes the proof. Note here that we used the fact that  
 476 leverage scores are independent of the choice of orthonormal basis [Woo14].  $\square$

477 **Proposition A.3** (Theorem 29 of [CW13]). *Given a matrix  $A \in \mathbb{R}^{n \times d}$ , let  $\sigma \in \mathbb{R}^n$  be the  $\ell_2$  leverage  
 478 scores of  $A$  (see definition 2.4). Then there is an algorithm which computes values  $\tilde{\sigma}_1, \tilde{\sigma}_2, \dots, \tilde{\sigma}_n$   
 479 such that  $\tilde{\sigma}_i = (1 \pm \epsilon)\sigma_i$  simultaneously for all  $i \in [n]$  with probability  $1 - 1/n^c$  for any constant  
 480  $c \geq 1$ . The runtime is  $\tilde{O}(\text{nnz}(A) + \text{poly}(d/\epsilon))$ .*

481 **Proposition A.4.** *Given  $A = \otimes_{i=1}^q A_i$ , where  $A_i \in \mathbb{R}^{n_i \times d_i}$ , there is an algorithm which, with  
 482 probability  $1 - 1/n^c$  for any constant  $c \geq 1$ , outputs a diagonal matrix  $D \in \mathbb{R}^{n \times n}$  with  $m$  non-  
 483 zeros entries, such that  $D_{i,i} = 1/(m\tilde{\sigma}_i)$  is non-zero with probability  $\tilde{\sigma}_i \in (1 \pm 1/10)\sigma_i(A)$ . The  
 484 time required is  $\tilde{O}(\sum_{i=1}^q \text{nnz}(A_i) + \text{poly}(dq/\epsilon) + mq)$ .*

485 *Proof.* By Proposition A.3, we can compute approximate leverage scores of each  $A_i$  up to error  
 486  $\Theta(1/q)$  in time  $\tilde{O}(\text{nnz}(A_i) + \text{poly}(d/\epsilon))$  with high probability. To sample a leverage score from  
 487  $A$ , it suffices to sample one leverage score from each of the  $A_i$ 's by Corollary A.2. The probability  
 488 that a given row  $\vec{i} = (i_1, \dots, i_q) \in [n_1] \times [n_2] \times \dots \times [n_q]$  of  $A$  is chosen is  $\prod_{j=1}^q \tilde{\sigma}(A_j)_{i_j} =$   
 489  $(1 \pm \Theta(1/q))^q \sigma_{\vec{i}}(A) = (1 \pm 1/10)\sigma_{\vec{i}}(A)$  as needed. Obtaining a sample takes  $\tilde{O}(1)$  time per  $A_i$   
 490 (since a random number needs to be generated to  $O(\log(n))$ -bits of precision in expectation and  
 491 with high probability to obtain this sample), thus  $O(q)$  time overall, so repeating the sampling  $M$   
 492 times gives the desired additive  $mq$  runtime.  $\square$

493 The  $q = 1$  version of the following result can be found in [CW13, SWZ19].

494 **Proposition A.5.** *Let  $D \in \mathbb{R}^{n \times n}$  be the diagonal row sampling matrix generated via Proposition  
 495 A.4, with  $m = \Theta(1/(\delta\epsilon^2))$  non-zero entries. Let  $A = \otimes_{i=1}^q A_i$  as above, and let  $U \in \mathbb{R}^{n \times r}$  be an  
 496 orthonormal basis for the column span of  $A$ , where  $r = \text{rank}(A)$ . Then for any matrix  $B$  with  $n$   
 497 rows, we have*

$$\Pr[\|U^\top D^\top DB - U^\top B\|_F \leq \epsilon \|U\|_F \|B\|_F] \geq 1 - \delta$$

498 *Proof.* By definition of leverage scores and Proposition A.4,  $D$  is a matrix which sample each row  
 499  $U_{i,*}$  of  $U$  with probability at least  $(9/10)\|U_{i,*}\|_2/\|U\|_F$ . Taking the average of  $m$  such rows,  
 500 we obtain the approximate matrix product result with error  $O(1/\sqrt{\delta m})$  with probability  $1 - \delta$  by  
 501 Theorem 2.1 of [KV17].  $\square$

502 We are now ready to prove the main theorem of this section, Theorem 3.1

503 **Theorem 3.1** (Kronecker product  $\ell_2$  regression) *Let  $D \in \mathbb{R}^{n \times n}$  be the diagonal row sampling matrix*  
 504 *generated via Proposition A.4, with  $m = \Theta(1/(\delta\epsilon^2))$  non-zero entries, and let  $A = \otimes_{i=1}^q A_i$ ,*  
 505 *where  $A_i \in \mathbb{R}^{n_i \times d_i}$ , and  $b \in \mathbb{R}^n$ , where  $n = \prod_{i=1}^q n_i$  and  $d = \prod_{i=1}^q d_i$ . Then we have let*  
 506  *$\hat{x} = \arg \min_{x \in \mathbb{R}^d} \|DAx - Db\|_2$ , and let  $x^* = \arg \min_{x' \in \mathbb{R}^d} \|Ax' - b\|_2$ . Then with probability*  
 507  *$1 - \delta$ , we have*

$$\|A\hat{x} - b\|_2 \leq (1 + \epsilon)\|Ax^* - b\|_2$$

508 Moreover, the total runtime requires to compute  $\hat{x}$  is

$$\tilde{O}\left(\sum_{i=1}^q \text{nnz}(A_i) + (dq/(\delta\epsilon))^{O(1)}\right).$$

509

510 *Proof.* Let  $U$  be an orthonormal basis for the column span of  $A$ . By Lemma 3.3 of [CW09], we have  
 511  $\|A(\hat{x} - x^*)\|_2 \leq 2\sqrt{\epsilon}\|Ax^* - b\|_2$ . Note that while Lemma 3.3 of [CW09] uses a different sketching  
 512 matrix  $D$  than us, the only property required for the proof of Lemma 3.3 is that  $|U^\top D^\top DB -$   
 513  $U^\top B|_F \leq \sqrt{\epsilon/d}\|A\|_F\|B\|_F$  with probability at least  $1 - \delta$  for any fixed matrix  $B$ , which we  
 514 obtain by Proposition A.5 by having  $O(d/(\delta\epsilon^2))$  non-zeros on the diagonal of  $D$ . By the normal  
 515 equations, we have  $A^\top(Ax^* - b) = 0$ , thus  $\langle A(\hat{x} - x^*), (Ax^* - b) \rangle = 0$ , and so by the Pythagorean  
 516 theorem we have

$$\|A\hat{x} - b\|_2^2 = \|Ax^* - b\|_2^2 + \|A(\hat{x} - x^*)\|_2^2 \leq (1 + 4\epsilon)\|Ax^* - b\|_2^2$$

517 Which completes the proof after rescaling of  $\epsilon$ . The runtime required to obtain the matrix  $D$  is  
 518  $\tilde{O}(\sum_{i=1}^q \text{nnz}(A_i) + \text{poly}(dq/\epsilon))$  by Proposition A.4, where we set  $D$  to have  $m = \Theta(d/(\delta\epsilon^2))$   
 519 non-zero entries on the diagonal. Once  $D$  is obtained, one can compute  $D(A + b)$  in time  $O(md)$ ,  
 520 thus the required time is  $O(\delta^{-1}(d/\epsilon)^2)$ . Finally, computing  $\hat{x}$  once  $DA, Db$  are computed requires  
 521 a single pseudo-inverse computation, which can be carried out in  $O(\delta^{-1}d^3/\epsilon^2)$  time (since  $DA$  now  
 522 has only  $O(\delta^{-1}(d/\epsilon)^2)$  rows).

523

□

## 524 B Missing Proofs from Section 3.1

525 We now give a complete proof of Theorem 3.2. Our high level approach follows that of [DDH<sup>+</sup>09].  
 526 Namely, we first obtain a vector  $x'$  which is a  $O(1)$  approximate solution to the optimal, and then  
 527 use the residual error  $\rho \in \mathbb{R}^d$  of  $x'$  to refine  $x'$  to a  $(1 \pm \epsilon)$  approximation  $\hat{x}$ . The fact that  $x'$  is  
 528 a constant factor approximation follows from our Lemma B.5. Given  $x'$ , by Lemma B.9 we can  
 529 efficiently compute the matrix  $\Sigma$  which samples from the coordinates of the residual error  $\rho =$   
 530  $(A_1 \otimes \cdots \otimes A_q)x' - b$  in the desired runtime. The sampling lemma is the main technical lemma,  
 531 and requires a careful multi-part sketching and sampling routine. Given this  $\Sigma$ , the fact that  $\hat{x}$  is a  
 532  $(1 + \epsilon)$  approximate solution follows directly from Theorem 6 of [DDH<sup>+</sup>09]. Our main theorem  
 533 and its proof is stated below. The proof will utilize the lemmas and sampling algorithm developed  
 534 in the sections which follow.

535 **Theorem 3.2** (Main result,  $\ell_p$ ,  $1 + \epsilon$ -approximation). *Fix  $1 \leq p < 2$ . Then for any constant*  
 536  *$q = O(1)$ , given matrices  $A_1, A_2, \dots, A_q$ , where  $A_i \in \mathbb{R}^{n_i \times d_i}$ , let  $n = \prod_{i=1}^q n_i$ ,  $d = \prod_{i=1}^q d_i$ . Let*  
 537  *$\hat{x} \in \mathbb{R}^d$  be the output of Algorithm 2. Then*

$$\|(A_1 \otimes A_2 \otimes \cdots \otimes A_q)\hat{x} - b\|_p \leq (1 + \epsilon) \min_{x \in \mathbb{R}^n} \|(A_1 \otimes A_2 \otimes \cdots \otimes A_q)x - b\|_p$$

538 holds with probability at least  $1 - \delta$ . In addition, our algorithm takes

$$\tilde{O}\left(\left(\sum_{i=1}^q \text{nnz}(A_i) + \text{nnz}(b) + (d/\epsilon)^{O(1)}\right) \log(1/\delta)\right)$$

539 time to output  $\hat{x} \in \mathbb{R}^d$ .

540 *Proof.* By Lemma B.5, the output  $x'$  in line 16 of algorithm 3.1 is an 8 approximation of the optimal  
541 solution, and  $x'$  is obtained in time  $\tilde{O}(\sum_{i=1}^q \text{nnz}(A_i) + (dq/\epsilon)^{O(1)})$ . We then obtain the residual  
542 error  $\rho = (A_1 \otimes \cdots \otimes A_q)x' - b$  (implicitly). By Theorem 6 of [DDH<sup>+</sup>09], if we let  $\Sigma \in \mathbb{R}^{n \times n}$   
543 be a row sampling matrix where  $\Sigma_{i,i} = 1/\alpha_i^{1/p}$  with probability  $\alpha_i = \min\{1, \max\{q_i, r_2 \frac{|\rho_i|^p}{\|\rho\|_p^p}\}$ ,  
544 where  $q_i$  is the row sampling probability used in the sketch  $\Pi$  from which  $x'$  was obtained,  
545 and  $r_2 = O(d^3/\epsilon^2 \log(1/\epsilon))$ , then the solution to  $\min_x \|\Sigma(A_1 \otimes \cdots \otimes A_q)x - \Sigma b\|_p$  will be a  
546  $(1 + \epsilon)$  approximately optimal solution. By Lemma B.9, we can obtain such a matrix  $\Sigma$  in time  
547  $\tilde{O}(\sum_{i=1}^q \text{nnz}(A_i) + q \text{nnz}(b) + (d \log(n)/(\epsilon\delta))^{O(q^2)})$ , which completes the proof of correctness. Fi-  
548 nally, note that we can solve the sketched regression problem  $\min_x \|\Sigma(A_1 \otimes \cdots \otimes A_q)x - \Sigma b\|_p$  which  
549 has  $O((d \log(n)/\epsilon)^{O(q^2)}(1/\delta))$  constraints and  $d$  variables in time  $O((d \log(n)/\epsilon)^{O(q^2)}(1/\delta))$  using  
550 linear programming for  $p = 1$  (see [CLS19] for the state of the art linear program solver), or more  
551 generally interior point methods for convex programming for  $p > 1$  (see [BCLL18] for the state of  
552 the art  $\ell_p$  solver).

553 Now to boost the failure probability from a  $O(1/\delta)$  to  $\log(1/\delta)$  dependency, we do the following.  
554 We run the above algorithm with  $\delta = 1/10$ , so that our output  $\hat{x} \in \mathbb{R}^d$  is a  $(1 + \epsilon)$  approximation  
555 with probability  $9/10$ . Now note that we actually have an  $(1 + \epsilon)$  estimate of the cost  $\|(A_1 \otimes A_2 \otimes$   
556  $\cdots \otimes A_q)\hat{x} - b\|_p$  of the solution  $\hat{x}$ , which is simply given by  $\|\Sigma(A_1 \otimes A_2 \otimes \cdots \otimes A_q)\hat{x} - \Sigma b\|_p$   
557 where  $\Sigma$  is the sampling matrix used to compute  $\hat{x}$ . Thus we can simply repeat the above process  
558  $O(\log(1/\delta))$  times, and take the solution with the minimal cost overall.  $\square$

559 We start by defining a tensor operation which will be useful for our analysis.

560 **Definition B.1** ( $((\cdot, \dots, \cdot), \cdot)$  operator for tensors and matrices). *Given tensor  $A \in \mathbb{R}^{d_1 \times d_2 \times \cdots \times d_q}$*   
561 *and matrices  $B_i \in \mathbb{R}^{n_i \times d_i}$  for  $i \in [q]$ , we define the tensor  $((B_1, B_2, \dots, B_q), A) \in$*   
562  *$\mathbb{R}^{n_1 \times n_2 \times \cdots \times n_q}$ .*

$$((B_1, B_2, \dots, B_q), A)_{i_1, \dots, i_q} = \sum_{i'_1=1}^{d_1} \sum_{i'_2=1}^{d_2} \cdots \sum_{i'_q=1}^{d_q} A_{i'_1, i'_2, \dots, i'_q} \prod_{\ell=1}^q (B_\ell)_{i_\ell, i'_\ell}$$

563 Observe for the case of  $q = 2$ , we just have  $((B_1, B_2), A) = B_1 A B_2^\top \in \mathbb{R}^{n_1 \times n_2}$ .

564 Using the above notation, we first prove a result about reshaping tensors.

565 **Lemma B.2** (Reshaping). *Given matrices  $A_1, A_2, \dots, A_q \in \mathbb{R}^{n_i \times d_i}$  and a tensor  $B \in$*   
566  *$\mathbb{R}^{n_1 \times n_2 \times \cdots \times n_q}$ , let  $n = \prod_{i=1}^q n_i$  and let  $d = \prod_{i=1}^q d_i$ . Let  $b$  denote the vectorization of*  
567  *$B$ . For any tensor  $X \in \mathbb{R}^{d_1 \times d_2 \times \cdots \times d_q}$ , we have  $\|((A_1, A_2, \dots, A_q), X) - B\|_\xi$  is equal to*  
568  *$\|(A_1 \otimes A_2 \otimes \cdots \otimes A_q)x - b\|_\xi$  where  $\xi$  is any entry-wise norm (such as an  $\ell_p$ -norm) and  $x$  is*  
569 *the vectorization of  $X$ . See Definition B.1 of the  $((\cdot, \dots, \cdot), \cdot)$  tensor operator.*

570 Observe, for the case of  $q = 2$ , this is equivalent to the statement that  $\|A_1 X A_2^\top - B\|_\xi = \|(A_1 \otimes$   
571  $A_2)x - b\|_\xi$ .

572 *Proof.* For the pair  $x \in \mathbb{R}^d$ ,  $X \in \mathbb{R}^{d_1 \times d_2 \times \cdots \times d_q}$ , the connection is the following:  $\forall i_1 \in$   
573  $[d_1], \dots, i_q \in [d_q]$ ,

$$x_{i_1 + \sum_{l=2}^q (i_l - 1) \cdot \prod_{t=1}^{l-1} d_t} = X_{i_1, \dots, i_q}.$$

574 Similarly, for  $b \in \mathbb{R}^n$ ,  $B \in \mathbb{R}^{n_1 \times n_2 \times \cdots \times n_q}$ , for any  $j_1, \dots, j_q \in [n_q]$ ,

$$b_{j_1 + \sum_{l=2}^q (j_l - 1) \cdot \prod_{t=1}^{l-1} n_t} = B_{j_1, j_2, \dots, j_q}.$$

575 For simplicity, for any  $(i_1, \dots, i_q) \in [d_1] \times \cdots \times [d_q]$  and  $(j_1, \dots, j_q) \in [n_1] \times \cdots \times [n_q]$  we define  
576  $\vec{i} = i_1 + \sum_{l=2}^q (i_l - 1) \cdot \prod_{t=1}^{l-1} d_t$  and similarly  $\vec{j} = j_1 + \sum_{l=2}^q (j_l - 1) \cdot \prod_{t=1}^{l-1} n_t$ . Then we can  
577 simplify the above relation and write  $x_{\vec{i}} = X_{i_1, i_2, \dots, i_q}$ , and  $b_{\vec{j}} = B_{j_1, j_2, \dots, j_q}$ .

578 For a matrix  $Z$ , let  $Z_{i,*}$  denote the  $i$ -th row of  $Z$ . We consider the  $\vec{j}$ -th entry of  $(A_1 \otimes A_2 \otimes \cdots \otimes A_q)x$ ,

$$\begin{aligned} ((A_1 \otimes A_2 \otimes \cdots \otimes A_q)x)_{\vec{j}} &= \left\langle (A_1 \otimes A_2 \otimes \cdots \otimes A_q)_{\vec{j},*} \cdot x \right\rangle \\ &= \sum_{i_1=1}^{d_1} \sum_{i_2=1}^{d_2} \cdots \sum_{i_q=1}^{d_q} \left( \prod_{l=1}^q (A_l)_{j_l, i_l} \right) \cdot x_{\vec{i}} \\ &= \sum_{i_1=1}^{d_1} \sum_{i_2=1}^{d_2} \cdots \sum_{i_q=1}^{d_q} \left( \prod_{l=1}^q (A_l)_{j_l, i_l} \right) \cdot X_{i_1, i_2, \dots, i_q} \\ &= ((A_1, A_2, \dots, A_q), X)_{j_1, \dots, j_q}. \end{aligned}$$

579 Where the last equality is by Definition (B.1). Since we also have  $b_{\vec{j}} = B_{j_1, \dots, j_q}$ , this completes the  
580 proof of the Lemma.  $\square$

### 581 B.1 Sampling from an $\ell_p$ -Well-Conditioned Base

582 In this Section, we discuss the first half of Algorithm 2 which computes  $x' \in \mathbb{R}^d$ , which we will  
583 show is a  $O(1)$ -approximate solution to the optimal. First note that by Lemma 2.3 together with fact  
584 2.6, we know that  $A_i R_i^{-1}$  is an  $\ell_p$  well conditioned basis for  $A_i$  (recall this means that  $A_i R_i^{-1}$  is  
585 a  $(\alpha, \beta, p)$  well conditioned basis for  $A$ , and  $\beta/\alpha = d_i^{O(1)}$ ) with probability  $1 - O(1/q)$ , and we  
586 can then union bound over this occurring for all  $i \in [q]$ . Given this, we now prove that  $(A_1 R_1^{-1} \otimes$   
587  $A_2 R_2^{-1} \otimes \cdots \otimes A_q R_q^{-1})$  is a well conditioned basis for  $(A_1 \otimes A_2 \otimes \cdots \otimes A_q)$ .

588 **Lemma B.3.** *Let  $A_i \in \mathbb{R}^{n_i \times d_i}$  and  $R_i \in \mathbb{R}^{d_i \times d_i}$ . Then if  $A_i R_i^{-1}$  is a  $(\alpha_i, \beta_i, p)$  well-conditioned*  
589 *basis for  $A_i$  for  $i = 1, 2, \dots, q$ , we have for all  $x \in \mathbb{R}^{d_1 \cdots d_q}$ :*

$$\prod_{i=1}^q \alpha_i \|x\|_p \leq \|(A_1 R_1^{-1} \otimes A_2 R_2^{-1} \otimes \cdots \otimes A_q R_q^{-1})x\|_p \leq \prod_{i=1}^q \beta_i \|x\|_p$$

590 *Proof.* We first consider the case of  $q = 2$ . We would like to prove

$$\alpha_1 \alpha_2 \|x\|_p \leq \|(A_1 R_1^{-1} \otimes A_2 R_2^{-1})x\|_p \leq \beta_1 \beta_2 \|x\|_p,$$

591 First note, by the reshaping Lemma B.2, this is equivalent to

$$\alpha_1 \alpha_2 \|X\|_p \leq \|A_1 R_1^{-1} X (R_2^{-1} A_2)^\top\|_p \leq \beta_1 \beta_2 \|X\|_p.$$

592 Where  $X \in \mathbb{R}^{d_1 \times d_2}$  is the tensorization of  $x$ . We first prove one direction. Let  $U_1 = A_1 R_1^{-1}$  and  
593  $U_2 = A_2 R_2^{-1}$ . We have

$$\begin{aligned} \|U_1 X U_2^\top\|_p^p &= \sum_{i_2=1}^{n_2} \|U_1 (X U_2^\top)_{i_2}\|_p^p \\ &\leq \sum_{i_2=1}^{n_2} \beta_1^p \|(X U_2^\top)_{i_2}\|_p^p \\ &= \beta_1^p \|X U_2^\top\|_p^p \\ &\leq \beta_1^p \beta_2^p \|X\|_p^p, \end{aligned}$$

594 where the first step follows from rearranging, the second step follows from the well-conditioned  
595 property of  $U_1$ , the third step follows from rearranging again, the last step follows from the well-  
596 conditioned property of  $U_2$ . Similarly, we have

$$\begin{aligned} \|U_1 X U_2^\top\|_p^p &= \sum_{i_2=1}^{n_2} \|U_1 (X U_2^\top)_{i_2}\|_p^p \\ &\geq \sum_{i_2=1}^{n_2} \alpha_1^p \|(X U_2^\top)_{i_2}\|_p^p \\ &= \alpha_1^p \|X U_2^\top\|_p^p \\ &\geq \alpha_1^p \alpha_2^p \|X\|_p^p, \end{aligned}$$

where again the first step follows from rearranging, the second step follows from the well-conditioned property of  $U_1$ , the third step follows from rearranging again, the last step follows from the well-conditioned property of  $U_2$ .

In general, for arbitrary  $q \geq 2$ , similarly using our reshaping lemma, we have

$$\begin{aligned} \|(\otimes_{i=1}^q (A_i R_i^{-1}))x\|_p &\geq \prod_{i=1}^q \alpha_i \|x\|_p, \\ \|(\otimes_{i=1}^q (A_i R_i^{-1}))x\|_p &\leq \prod_{i=1}^q \beta_i \|x\|_p. \end{aligned}$$

□

Putting this together with fact 2.6, and noting  $d = d_1 \cdots d_q$ , we have

**Corollary B.4.** *Let  $A_i R_i^{-1}$  be as in algorithm 2. Then we have for all  $x \in \mathbb{R}^{d_1 \cdots d_q}$ :*

$$(1/d)^{O(1)} \|x\|_p \leq \|(A_1 R_1^{-1} \otimes \cdots \otimes A_q R_q^{-1})x\|_p \leq d^{O(1)} \|x\|_p,$$

*In other words,  $(A_1 R_1^{-1} \otimes \cdots \otimes A_q R_q^{-1})$  is a well conditioned  $\ell_p$  basis for  $(A_1 \otimes \cdots \otimes A_q)$*

From this, we can obtain the following result.

**Lemma B.5.** *Let  $x' \in \mathbb{R}^d$  be the output of the  $O(1)$ -Approximate  $\ell_p$  Regression Procedure in Algorithm 2. Then with probability 99/100 we have*

$$\|(A_1 \otimes \cdots \otimes A_q)x' - b\|_p \leq 8 \min_x \|(A_1 \otimes \cdots \otimes A_q)x - b\|_p$$

*Moreover, the time required to compute  $x'$  is  $\tilde{O}(\sum_{i=1}^q \text{nnz}(A_i) + (dq/\epsilon)^{O(1)})$ .*

*Proof.* By Theorem 6 of [DDH<sup>+</sup>09], if we let  $\Pi$  be a diagonal row sampling matrix such that  $\Pi_{i,i} = 1/q_i^{1/p}$  with probability  $q_i \geq \min\{1, r_1 \frac{\|U_{i,*}\|_p^p}{\|U\|_p^p}\}$ , where  $U$  is a  $\ell_p$  well-conditioned basis for  $(A_1 \otimes \cdots \otimes A_q)$  and  $r_1 = O(d^3)$ , then the solution  $x'$  to

$$\min_x \|\Pi((A_1 \otimes \cdots \otimes A_q)x - b)\|$$

will be a 8-approximation. Note that we can solve the sketched regression problem  $\min_x \|\Pi((A_1 \otimes \cdots \otimes A_q)x' - b)\|$  which has  $O(\text{poly}(d/\epsilon))$  constraints and  $d$  variables in time  $\text{poly}(d/\epsilon)$  using linear programming for  $p = 1$  (see [CLS19] for the state of the art linear program solver), or more generally interior point methods for convex programming for  $p > 1$  (see [BCLL18] for the state of the art  $\ell_p$  solver).

Then by Corollary B.4, we know that setting  $U = (A_1 R_1^{-1} \otimes \cdots \otimes A_q R_q^{-1})$  suffices, so now we must sample rows of  $U$ . To do this, we must approximately compute the norms of the rows of  $U$ . Here, we use the fact that  $\|\cdot\|_p^p$  norm of a row of  $(A_1 R_1^{-1} \otimes \cdots \otimes A_q R_q^{-1})$  is the product of the row norms of the  $A_i R_i^{-1}$  that correspond to that row. Thus it suffices to sample a row  $j_i$  from each of the  $A_i R_i^{-1}$ 's with probability at least  $\min\{1, r_1 \|(A_i R_i^{-1})_{j_i,*}\|_p^p / \|A_i R_i^{-1}\|_p^p\}$  for each  $i \in [q]$ .

To do this, we must estimate all the row norms  $\|(A_i R_i^{-1})_{j_i,*}\|_p^p$  to  $(1 \pm 1/10)$  error. This is done in steps 7 – 10 of Algorithm 2, which uses dense  $p$ -stable sketches  $Z \in \mathbb{R}^{d \times \tau}$ , and computes  $(A_i R_i^{-1} Z)$ , where  $\tau = \Theta(\log(n))$ . Note that computing  $R_i^{-1} Z \in \mathbb{R}^{d \times \tau}$  requires  $\tilde{O}(d^2)$ . Once computed,  $A_i(R_i^{-1} Z)$  can be computed in  $\tilde{O}(\text{nnz}(A_i))$  time. We then take the median of the coordinates of  $(A_i R_i^{-1} Z)$  (normalized by the median of the  $p$ -stable distribution  $\mathcal{D}_p$ , which can be efficiently approximated to  $(1 \pm \epsilon)$  in  $O(\text{poly}(1/\epsilon))$  time, see Appendix A.2 of [KNW10] for details) as our estimates for the row norms. This is simply the Indyk median estimator [Ind06], and gives a  $(1 \pm 1/10)$  estimate  $a_{i,j}$  of all the row norms  $\|(A_i R_i^{-1})_{j,*}\|_p^p$  with probability  $1 - 1/\text{poly}(n)$ . Then it follows by Theorem 6 of [DDH<sup>+</sup>09] that  $x'$  is a 8-approximation of the optimal solution with probability 99/100 (note that we amplified the probability by increasing the sketch sizes  $S_i$  by a constant factor), which completes the proof.

□

## 632 B.2 $\ell_p$ Sampling From the residual of a $O(1)$ -factor approximation

633 By Lemma B.5 in the prior section, we know that the  $x'$  first returned by the in algorithm 2 is a  
 634 8-approximation. We now demonstrate how we can use this  $O(1)$  approximation to obtain a  $(1 + \epsilon)$   
 635 approximation. The approach is again to sample rows of  $(A_1 \otimes \cdots \otimes A_q)$ . But instead of sampling  
 636 rows with the well-conditioned leverage scores  $q_i$ , we now sample the  $i$ -th row with probability  
 637  $\alpha_i = \min\{1, \max\{q_i, r_2|\rho_i|^p/\|\rho\|_p^p\}\}$ , where  $\rho = (A_1 \otimes \cdots \otimes A_q)x' - b \in \mathbb{R}^n$  is the *residual*  
 638 *error* of the  $O(1)$ -approximation  $x'$ . Thus we must now determine how to sample quickly from the  
 639 residuals  $|\rho_i|^p/\|\rho\|_p^p$ . Our sampling algorithm will need a tool originally developed in the streaming  
 640 literature.

641 **Count-sketch for heavy hitters with the Dyadic Trick.** We now introduce a sketch  $S$  which  
 642 finds the  $\ell_2$  heavy hitters in a vector  $x$  efficiently. This sketch  $S$  is known as count-sketch for heavy  
 643 hitters with the Dyadic Trick. To build  $S$  we first stack  $\Theta(\log(n))$  copies of the *count sketch matrix*  
 644  $S^i \in \mathbb{R}^{k' \times n}$  [CW13]. The matrix  $S^i$  is constructed as follows.  $S^i$  has exactly one non-zero entry  
 645 per column, which is placed in a uniformly random row, and given the value 1 or  $-1$  uniformly  
 646 at random. For  $S^i$ , let  $h_i : [n] \rightarrow [k']$  be such that  $h_i(t)$  is the row with the non-zero entry in  
 647 the  $t$ -th column of  $S^i$ , and let  $g_i : [n] \rightarrow \{1, -1\}$  be such that the value of that non-zero entry  
 648 is  $g_i(t)$ . Note that the  $h_i, g_i$  can be implemented as 4-wise independent hash functions. Fix any  
 649  $x \in \mathbb{R}^n$ . Then given  $S^1 x, S^2 x, \dots, S^{\Theta(\log(n))} x$ , we can estimate the value of any coordinate  $x_j$  by  
 650  $\text{median}_{i \in \Theta(\log(n))} \{g_i(j)(S^i x)_{h_i(j)}\}$ .

651 It is well-known that this gives an estimate of  $x_j$  with additive error  $\Theta(1/\sqrt{k'})\|x\|_2$  with probability  
 652  $1 - 1/\text{poly}(n)$  for all  $j \in [n]$  [CCFC04]. However, naively, to find the heaviest coordinates in  $x$ , that  
 653 is all coordinates  $x_j$  with  $|x_j| \geq \Theta(1/\sqrt{k'})\|x\|_2$ , one would need to query  $O(n)$  estimates. This  
 654 is where the Dyadic trick comes in [CM05]. We repeat the above process  $\Theta(\log(n))$  times, with  
 655 matrices  $S^{(i,j)}$ , for  $i, j \in \Theta(\log(n))$ . Importantly, however, in  $S^{(i,j)}$ , for all  $t, t' \in [n]$  such that the  
 656 first  $j$  most significant bits in their binary identity representation are the same, we set  $h_{(i,j)}(t) =$   
 657  $h_{(i,j)}(t')$ , effectively collapsing these identities to one. To find a heavy item, we can then query the  
 658 values of the *\*two\** identities from  $S^{(1,1)}, S^{(2,1)}, \dots, S^{(\Theta(\log(n)),1)}$ , and recurse into all the portions  
 659 which have size at least  $\Theta(1/\sqrt{k'})\|x\|_2$ . It is easy to see that we recurse into at most  $O(k')$  such  
 660 pieces in each of the  $\Theta(\log(n))$  levels, and it takes  $O(\log(n))$  time to query a single estimate, from  
 661 which the desired runtime of  $O(k' \log^2(n))$  is obtained. For a further improvement on size  $k$  of the  
 662 overall sketched required to quickly compute  $Q$ , see [LNNT16]. We summarize this construction  
 663 below in definition B.6.

664 **Definition B.6** (Count-sketch for heavy hitters with Dyadic Trick [CCFC04, LNNT16]). *There is*  
 665 *a randomized sketch  $S \in \mathbb{R}^{k \times n}$  with  $k = O(\log^2(n)/\epsilon^2)$  such that, for a fixed vector  $x \in \mathbb{R}^n$ ,*  
 666 *given  $Sx \in \mathbb{R}^k$ , one can compute a set  $Q \subset [n]$  with  $|Q| = O(1/\epsilon^2)$  such that  $\{i \in [n] \mid |x_i| \geq$   
 667  $\epsilon\|x\|_2\} \subseteq Q$  with probability  $1 - 1/\text{poly}(n)$ . Moreover,  $Sx$  can be computed in  $O(\log^2(n) \text{nnz}(x))$   
 668 time. Given  $Sx$ , the set  $Q$  can be computed in time  $O(k)$ .*

669 We begin with some notation. For a vector  $y \in \mathbb{R}^n$ , where  $n = n_1 \cdots n_q$ , one can index any entry  
 670 of  $y_i$  via  $\vec{i} = (i_1, i_2, \dots, i_q) \in [n_1] \times \cdots \times [n_q]$  via  $i = i_1 + \sum_{j=2}^q (i_j - 1) \prod_{l=1}^{j-1} n_l$ . It will useful  
 671 to index into such a vector  $y$  interchangably via a vector  $y_{\vec{i}}$  and an index  $y_j$  with  $j \in [n]$ . For any  
 672 set of subsets  $T_i \subset [n_i]$ , we can define  $y_{T_1 \times \dots \times T_q} \in \mathbb{R}^n$  as  $y$  restricted to the  $\vec{i} \in T_1 \times \cdots \times T_q$ .  
 673 Here, by restricted, we mean the coordinates in  $y$  that are not in this set are set equal to 0. Similarly,  
 674 for a  $y \in \mathbb{R}^{n_i}$  and  $S \subset [n_i]$ , we can define  $y_S$  as  $y$  restricted to the coordinates in  $S$ . Note that in  
 675 Algorithm 4,  $\mathbb{I}_n$  denotes the  $n \times n$  identity matrix for any integer  $n$ . We first prove a proposition on  
 676 the behavior of Kronecker products of  $p$ -stable vectors, which we will need in our analysis.

677 **Proposition B.7.** *Let  $Z_1, Z_2, \dots, Z_q$  be independent vectors with entries drawn i.i.d. from the  $p$ -*  
 678 *stable distribution, with  $Z_i \in \mathbb{R}^{n_i}$ . Now fix any  $i \in [q]$ , and any  $x \in \mathbb{R}^n$ , where  $n = n_1 n_2 \cdots n_q$ .*  
 679 *Let  $e_j \in \mathbb{R}^{n_i}$  be the  $j$ -th standard basis column vector for any  $j \in [n_i]$ . Let  $\Gamma(i, j) = [n_1] \times [n_2] \times$   
 680  $\cdots \times [n_{i-1}] \times \{j\} \times [n_{i+1}] \times \cdots \times [n_q]$ . Define the random variable*

$$\mathcal{X}_{i,j}(x) = |(Z_1 \otimes Z_2 \otimes \cdots \otimes Z_{i-1} \otimes e_j^\top \otimes Z_{i+1} \otimes \cdots \otimes Z_q)x|^p.$$

681 *Then for any  $\lambda > 1$ , with probability at least  $1 - O(q/\lambda)$  we have*

$$\|x_{\Gamma(i,j)}\|_p^p / \lambda^q \leq \mathcal{X}_{i,j}(x) \leq (\lambda \log(n))^q \|x_{\Gamma(i,j)}\|_p^p$$



---

**Algorithm 4** Algorithm to  $\ell_p$  sample  $\Theta(r_2)$  entries of  $\rho = (A_1 \otimes \cdots \otimes A_q)x' - b$

---

```

1: procedure RESIDUAL  $\ell_p$  SAMPLE( $\rho, r_2$ )
2:    $r_3 \leftarrow \Theta(r_2 \log^2(n)/\delta)$ .
3:   Generate i.i.d.  $p$ -stable vectors  $Z^{1,j}, Z^{2,j}, \dots, Z^{q,j} \in \mathbb{R}^n$  for  $j \in [\tau]$  for  $\tau = \Theta(\log(n))$ 
4:    $T \leftarrow \emptyset$  ▷ sample set to return
5:   Pre-compute and store  $Z^{i,j} A_i \in \mathbb{R}^{1 \times d_i}$  for all  $i \in [q]$  and  $j \in [\tau]$ 
6:   Generate count-sketches for heavy hitters  $S^i \in \mathbb{R}^{k \times n_i}$  of Definition B.6 for all  $i \in [q]$ ,
   where  $k = O(\log^2(n)r_3^{O(1)})$ .
7:   for  $t = 1, 2, \dots, r_3$  do
8:      $s = (s_1, \dots, s_q) \leftarrow (\emptyset, \dots, \emptyset)$  ▷ next sample to return
9:      $w^j \leftarrow ((\mathbb{I}_{n_1}) \otimes (\bigotimes_{k=2}^q Z^{k,j})\rho) \in \mathbb{R}^{n_1}$  ▷  $\mathbb{I}_n \in \mathbb{R}^{n \times n}$  is identity
10:    Define  $w \in \mathbb{R}^{n_1}$  by  $w_l = \text{median}_{j \in [\tau]} \{|w_l^j|\}$  for  $l \in [n_1]$ 
11:    Sample  $j^* \in [n_1]$  from the distribution  $\left(\frac{|w_1|^p}{\|w\|_p^p}, \frac{|w_2|^p}{\|w\|_p^p}, \dots, \frac{|w_{n_1}|^p}{\|w\|_p^p}\right)$ 
12:     $s_1 \leftarrow j^*$ 
13:    for  $i = 2, \dots, q$  do
14:      for  $j \in [\tau]$  do
15:        Write  $e_{a_k}^\top \in \mathbb{R}^{1 \times n_k}$  as the standard basis vector
16:         $v_i^j \leftarrow S^i \left( \left( \bigotimes_{k=1}^{i-1} e_{a_k}^\top \right) \otimes (\mathbb{I}_{n_i}) \otimes \left( \bigotimes_{k=i+1}^q Z^{k,j} \right) \rho \right) \in \mathbb{R}^k$ 
17:        Compute heavy hitters  $H_{i,j} \subset [n_i]$  from  $v_i^j$  ▷ Definition B.6
18:         $\beta_i^j \leftarrow \left( \left( \bigotimes_{k=1}^{i-1} e_{a_k}^\top \right) \otimes \left( \bigotimes_{k=i}^q Z^{k,j} \right) \rho \right) \in \mathbb{R}$ 
19:      end for
20:      Define  $\beta_i \in \mathbb{R}^{k'}$  by  $\beta_i = \text{median}_{j \in [\tau]} \{|\beta_i^j|^p\}$ 
21:       $H_i = \bigcup_{j=1}^\tau H_{i,j}$ 
22:       $\gamma_i \leftarrow \text{median}_{j \in [\tau]} \left( \left( \bigotimes_{k=1}^{i-1} e_{a_k}^\top \right) \otimes Z_{[n_i] \setminus H_i}^{i,j} \otimes \left( \bigotimes_{k=i+1}^q Z^{k,j} \right) \rho \right) \in \mathbb{R}$ 
23:      if with probability  $1 - \gamma_i/\beta_i$  then
24:        Draw  $\xi \in H_i$  with probability
        
$$\frac{\text{median}_{j \in \tau} \left| \left( \left( \bigotimes_{k=1}^{i-1} e_{a_k}^\top \right) \otimes (e_\xi^\top) \otimes \left( \bigotimes_{k=i+1}^q Z^{k,j} \right) \rho \right) \right|^p}{\sum_{\xi' \in H_i} \text{median}_{j \in \tau} \left| \left( \left( \bigotimes_{k=1}^{i-1} e_{a_k}^\top \right) \otimes (e_{\xi'}^\top) \otimes \left( \bigotimes_{k=i+1}^q Z^{k,j} \right) \rho \right) \right|^p}$$

25:         $s_i \leftarrow \xi$ 
26:      else ▷  $s_i$  was not sampled as a heavy hitter
27:        Randomly partition  $[n_i]$  into  $\Omega_1^i, \Omega_2^i, \dots, \Omega_\eta^i$  with  $\eta = \Theta(r_3^2)$ 
28:        Sample  $t \sim [\eta]$  uniformly at random
29:        for  $j \in \Omega_t \setminus H_i$  do
30:           $\theta_j = \text{median}_{l \in [\tau]} \left( \left| \left( \bigotimes_{k=1}^{i-1} e_{a_k}^\top \right) \otimes (e_j^\top) \otimes \left( \bigotimes_{k=i+1}^q Z^{k,l} \right) \rho \right|^p \right)$ 
31:        end for
32:        Sample  $s_i \leftarrow j^*$  from the distribution  $\left\{ \frac{\theta_j}{\sum_{j' \in \Omega_t \setminus H_i} \theta_{j'}} \right\}_{j \in \Omega_t \setminus H_i}$ 
33:      end if
34:    end for
35:     $T \leftarrow S \cup s$  where  $s = (s_1, \dots, s_q)$ 
36:  end for
37:  return sample set  $T$ 
38: end procedure

```

---

682 *Proof.* First observe that we can reshape  $y = x_\Gamma \in \mathbb{R}^m$  where  $m = n/n_i$ , and re-write this random  
683 variable as  $\mathcal{X}_{i,j}(x) = |(Z_1 \otimes Z_2 \otimes \cdots \otimes Z_{q-1})y|^p$ . By reshaping Lemma B.2, we can write this  
684 as  $|(Z_1 \otimes Z_2 \otimes \cdots \otimes Z_{q-2})Y Z_{q-1}^\top|^p$ , where  $Y \in \mathbb{R}^{m/n_{q-1} \times n_{q-1}}$ . We first prove a claim. In the  
685 following, for a matrix  $A$ , let  $\|A\|_p^p = \sum_{i,j} |A_{i,j}|^p$ .

686 **Claim B.8.** Let  $Z$  be any  $p$ -stable vector and  $X$  a matrix. Then for any  $\lambda > 1$ , with probability  
687  $1 - O(1/\lambda)$ , we have

$$\lambda^{-1} \|X\|_p^p \leq \|XZ\|_p^p \leq \log(n)\lambda \|X\|_p^p.$$

688 *Proof.* By  $p$ -stability, each entry of  $|(XZ)_i|^p$  is distributed as  $|z_i|^p \|X_{i,*}\|_p^p$ , where  $z_i$  is again  $p$ -  
689 stable (but the  $z_i$ 's are not independent). Now  $p$ -stables have tails that decay at the rate  $\Theta(1/x^p)$   
690 (see Chapter 1.5 of [Nol07]), thus  $\Pr[|z_i|^p > x] = O(1/x)$  for any  $x > 0$ . We can condition on  
691 the fact that  $z_i < \lambda \cdot n^{10}$  for all  $i$ , which occurs with probability at least  $1 - n^{-9}/\lambda$  by a union  
692 bound. Conditioned on this, we have  $\mathbb{E}[|z_i|^p] = O(\log(n))$  (this can be seen by integrating over the  
693 truncated tail  $O(1/x)$ ), and the upper bound then follows from a application of Markov's inequality.

694 For the lower bound Let  $Y_i$  be an indicator random variable indicating the event that  $|z_i|^p < 2/\lambda$ .  
695 Now  $p$ -stables are anti-concentrated, namely, their pdf is upper bounded by a constant everywhere.  
696 It follows that  $\Pr[Y_i] < c/\lambda$  for some constant  $c$ . By Markov's inequality  $\Pr[\sum_i Y_i \|X_{i,*}\|_p^p >$   
697  $\|X\|_p^p/2] < O(1/\lambda)$ . Conditioned on this, the remaining  $\|X\|_p^p/2$  of the  $\ell_p$  mass shrinks by less  
698 than a  $2/\lambda$  factor, thus  $\|XZ\|_p^p > (\|X\|_p^p/2)(2/\lambda) = \|X\|_p^p/\lambda$  as needed.  $\square$

699 By the above claim, we have  $\|Y\|_p/\lambda^{1/p} \leq \|YZ_{q-1}^\top\|_p \leq (\log(n)\lambda)^{1/p} \|Y\|_p$  with probability  
700  $1 - O(1/\lambda)$ . Given this, we have  $\mathcal{X}_{i,j}(x) = |(Z_1 \otimes Z_2 \otimes \dots \otimes Z_{q-2})y'|^p$ , where  $\|Y\|_p/\lambda^{1/p} \leq$   
701  $\|y'\|_p \leq (\log(n)\lambda)^{1/p} \|Y\|_p$ . We can inductively apply the above argument, each time getting a blow  
702 up of  $(\log(n)\lambda)^{1/p}$  in the upper bound and  $(1/\lambda)^p$  in the lower bound, and a failure probability of  
703  $(1/\lambda)$ . Union bounding over all  $q$  steps of the induction, the proposition follows.  $\square$

704

705 **Lemma B.9.** Fix any  $r_2 \geq 1$ , and suppose that  $x' = \min_x \|\Pi(A_1 \otimes \dots \otimes A_q)x - \Pi b\|_p$  and  
706  $\Pi \in \mathbb{R}^{n \times n}$  is a row sampling matrix such that  $\Pi_{i,i} = 1/q_i^{1/p}$  with probability  $q_i$ . Define the  
707 residual error  $\rho = (A_1 \otimes \dots \otimes A_q)x' - b \in \mathbb{R}^n$ . Then Algorithm 4, with probability  $1 - \delta$ ,  
708 succeeds in outputting a row sampling matrix  $\Sigma \in \mathbb{R}^{n \times n}$  such that  $\Sigma_{i,i} = 1/\alpha_i^{1/p}$  with probability  
709  $\alpha_i = \min\{1, \max\{q_i, r_3 |\rho_i|^p / \|\rho\|_p^p\}\}$  for some  $r_3 \geq r_2$ , and otherwise  $\Sigma_{i,i} = 0$ . The algorithm  
710 runs in time

$$\tilde{O} \left( \sum_{i=1}^q \text{nnz}(A_i) + q \text{nnz}(b) + (r_2 \log(n)/\delta)^{O(q^2)} \right).$$

711 *Proof.* The algorithm is given formally in figure 4. We analyze the runtime and correctness here.

712 **Proof of Correctness.** The approach of the sampling algorithm is as follows. Recall that we can  
713 index into the coordinates of  $\rho \in \mathbb{R}^n$  via  $\vec{a} = (a_1, \dots, a_q)$  where  $a_i \in [n_i]$ . We build the coordinates  
714 of  $\vec{a}$  one by one. To sample a  $\vec{a} \in \prod_{i=1}^q [n_i]$ , we can first sample  $a_1 \in [n_1]$  from the distribution  
715  $\Pr[a_1 = j] = \sum_{\vec{u}: u_1=j} |\rho_{\vec{u}}|^p / (\sum_{\vec{u}} |\rho_{\vec{u}}|^p)$ . Once we fix  $a_1$ , we can sample  $a_2$  from the conditional  
716 distribution  $\Pr[a_2 = j] = \sum_{\vec{u}: u_2=j, u_1=a_1} |\rho_{\vec{u}}|^p / (\sum_{\vec{u}: u_1=a_1} |\rho_{\vec{u}}|^p)$ , and so on. For  
717 notation, given a vector  $\vec{a} = (a_1, \dots, a_{i-1})$ , let  $\Delta(\vec{a}) = \{\vec{u} \in [n_1] \times \dots \times [n_q] \mid a_j = u_j \text{ for all } j =$   
718  $1, 2, \dots, i-1\}$ . Then in general, when we have sampled  $\vec{a} = (a_1, \dots, a_{i-1})$  for some  $i \leq q$ , we  
719 need to sample  $a_i \leftarrow j \in [n_i]$  with probability

$$\Pr[a_i = j] = \sum_{\vec{u} \in \Delta(\vec{a}): u_i=j} |\rho_{\vec{u}}|^p / \left( \sum_{\vec{u} \in \Delta(\vec{a})} |\rho_{\vec{u}}|^p \right).$$

720 We repeat this process to obtain the desired samples. Note that to sample efficiently, we will have  
721 to compute these aforementioned sampling probabilities approximately. Because of the error in  
722 approximating, instead of returning  $r_2$  samples, we over-sample and return  $r_3 = \Theta(r_2 \log^{q^2}(n))$   
723 samples.

724 The first step of the algorithm is to generate the  $p$ -stable vectors  $Z^{i,j} \in \mathbb{R}^{n_i}$  for  $i \in [q]$   
725 and  $j = 1, 2, \dots, \Theta(\log(n))$ . We can pre-compute and store  $Z^{i,j} A_i$  for  $i \in [q]$ , which takes



726  $\tilde{O}(\sum_{i=1}^q \text{nnz}(A_i))$  time. We set  $w^j \leftarrow ((\mathbb{I}_{n_1}) \otimes (\bigotimes_{k=2}^q Z^{k,j})\rho) \in \mathbb{R}^{n_1}$  and define  $w \in \mathbb{R}^{n_1}$   
 727 by  $w_l = \text{median}_{j \in [\tau]} \{|w_l^j|\}$  for  $l \in [n_1]$ . Observe that  $w_l^j$  is an estimate of  $\sum_{\vec{u}: u_1=l} |\rho_{\vec{u}}|^p$ . By  
 728 Proposition B.7, it is a  $(c \log(n))^q$  approximation with probability at least  $3/4$  for some constant  $c$ .  
 729 Taking the median of  $\Theta(\log(n))$  repetitions, we have that

$$c^{-q} \cdot \sum_{\vec{u}: u_1=l} |\rho_{\vec{u}}|^p \leq |w_l|^p \leq (c \log(n))^q \cdot \sum_{\vec{u}: u_1=l} |\rho_{\vec{u}}|^p$$

730 with probability  $1 - 1/\text{poly}(n)$ , and we can then union bound over all such estimates every con-  
 731 ducted over the course of the algorithm. We call the above estimate  $|w_l|^p$  a  $O((c \log(n))^q)$ -error  
 732 estimate of  $\sum_{\vec{u}: u_1=l} |\rho_{\vec{u}}|^p$ . Given this, we can correctly and independently sample the first coor-  
 733 dinate of each of the  $\Theta(r_3)$  samples. We now describe how to sample the  $i$ -th coordinate. So  
 734 in general, suppose we have sampled  $(a_1, \dots, a_{i-1})$  so far, and we need to now sample  $a_i \in [n_i]$   
 735 conditioned on  $(a_1, \dots, a_{i-1})$ . We first consider

$$W^{i,k} = \left( \left( \bigotimes_{k=1}^{i-1} e_{a_k}^\top \right) \otimes (\mathbb{I}_{n_i}) \otimes \left( \bigotimes_{k=i+1}^q Z^{k,j} \right) \rho \right) \in \mathbb{R}^{n_i}$$

736 Note that the  $j$ -th coordinate  $W_j^{i,k}$  for  $W^{i,k}$  is an estimate of  $\sum_{\vec{u} \in \Delta(\vec{a}): u_i=j} |\rho_{\vec{u}}|^p$ . Again by By  
 737 Proposition B.7, with probability  $1 - 1/\text{poly}(n)$ , we will have  $|W_j^{i,k}|^p$  is a  $O((c \log(n))^q)$ -error  
 738 estimate of  $\sum_{\vec{u} \in \Delta(\vec{a}): u_i=j} |\rho_{\vec{u}}|^p$  or at least one  $k \in [\tau]$ . Our goal will now be to find all  $j \in [n_i]$   
 739 such that  $\sum_{\vec{u} \in \Delta(\vec{a}): u_i=j} |\rho_{\vec{u}}|^p \geq \Theta((c \log(n))^q / r_3^8) \sum_{\vec{u} \in \Delta(\vec{a})} |\rho_{\vec{u}}|^p$ . We call such a  $j$  a *heavy hitter*.

740 Let  $Q_i \subset [n_i]$  be the set of heavy hitters. To find all the heavy hitters, we use the count-sketch  
 741 for heavy hitters with the Dyadic trick of definition B.6. We construct this count-sketch of def B.6  
 742  $S^i \in \mathbb{R}^{k' \times n_i}$  where  $k' = O(\log^2(n) r_3^{16})$ . We then compute  $S^i W^{i,k}$ , for  $k = 1, 2, \dots, \tau$ , and obtain  
 743 the set of heavy hitters  $h \in H_{i,k} \subset [n_i]$  which satisfy  $|W_j^{i,k}|^p \geq \Theta(1/r_3^8) \|W^{i,k}\|_p^p$ . By the above  
 744 discussion, we know that for each  $j \in Q_i$ , we will have  $|W_j^{i,k}|^p \geq \Theta(1/r_3^{16}) \|W^{i,k}\|_p^p$  for at least  
 745 one  $k \in [\tau]$  with high probability. Thus  $H_i = \bigcup_{k=1}^\tau H_{i,k} \supseteq Q_i$ .

746 We now will decide to either sample a heavy hitter  $\xi \in H_i$ , or a non-heavy hitter  $\xi \in$   
 747  $[n_i] \setminus H_i$ . By Proposition B.7, we can compute a  $O((c \log(n))^{-q})$ -error estimate  $\beta_i =$   
 748  $\text{median}_{j \in [\tau]} \left| \left( \left( \bigotimes_{k=1}^{i-1} e_{a_k}^\top \right) \otimes \left( \bigotimes_{k=i}^q Z^{k,j} \right) \rho \right) \right|^p$  of  $\sum_{\vec{u} \in \Delta(\vec{a})} |\rho_{\vec{u}}|^p$ , meaning:

$$O(c^{-2q}) \sum_{\vec{u} \in \Delta(\vec{a})} |\rho_{\vec{u}}|^p \leq \beta_i \leq O((c \log n)^q) \sum_{\vec{u} \in \Delta(\vec{a})} |\rho_{\vec{u}}|^p.$$

749 Again, by Proposition B.7, we can compute a  $O((c \log(n))^{-q})$ -error estimate  $\gamma_i \leftarrow$   
 750  $\text{median}_{j \in [\tau]} \left( \left( \bigotimes_{k=1}^{i-1} e_{a_k}^\top \right) \otimes Z_{[n_i] \setminus H_i}^{i,j} \otimes \left( \bigotimes_{k=i+1}^q Z^{k,j} \right) \rho \right)$  of  $\sum_{h \in [n_i] \setminus H_i} \sum_{\vec{u} \in \Delta(\vec{a}): u_i=j} |\rho_{\vec{u}}|^p$ . It  
 751 follows that

$$O(c^{-2q}) \frac{\sum_{h \in [n_i] \setminus H_i} \sum_{\vec{u} \in \Delta(\vec{a}): u_i=j} |\rho_{\vec{u}}|^p}{\sum_{\vec{u} \in \Delta(\vec{a})} |\rho_{\vec{u}}|^p} \leq \frac{\gamma_i}{\beta_i} \leq O((c \log n)^{2q}) \frac{\sum_{h \in [n_i] \setminus H_i} \sum_{\vec{u} \in \Delta(\vec{a}): u_i=j} |\rho_{\vec{u}}|^p}{\sum_{\vec{u} \in \Delta(\vec{a})} |\rho_{\vec{u}}|^p}$$

752 In other words,  $\gamma_i/\beta_i$  is a  $O((c \log(n))^{2q})$ -error approximation of the true probability that we should  
 753 sample a non-heavy item. Thus with probability  $1 - \gamma_i/\beta_i$ , we choose to sample a heavy item.

754 To sample a heavy item, for each  $\xi \in H_i$ , by Proposition B.7, we can compute an  $O((c \log(n))^{-q})$ -  
 755 error estimate  $\text{median}_{j \in \tau} \left| \left( \left( \bigotimes_{k=1}^{i-1} e_{a_k}^\top \right) \otimes (e_\xi^\top) \otimes \left( \bigotimes_{k=i+1}^q Z^{k,j} \right) \rho \right) \right|^p$  of  $\sum_{\vec{u} \in \Delta(\vec{a}): u_i=\xi} |\rho_{\vec{u}}|^p$ ,  
 756 meaning

$$\begin{aligned} \left( O(c^{-q}) \sum_{\vec{u} \in \Delta(\vec{a}): u_i = \xi} |\rho_{\vec{u}}|^p \right) &\leq \text{median}_{j \in \tau} \left| \left( \left( \bigotimes_{k=1}^{i-1} e_{a_k}^\top \right) \otimes (e_\xi^\top) \otimes \left( \bigotimes_{k=i+1}^q Z^{k,j} \right) \rho \right) \right|^p \\ &\leq \left( O((c \log n)^q) \sum_{\vec{u} \in \Delta(\vec{a}): u_i = \xi} |\rho_{\vec{u}}|^p \right) \end{aligned}$$

Thus we can choose to sample a heavy item  $\xi \in H_i$  from the distribution given by

$$\Pr[\text{sample } a_i \leftarrow \xi] = \frac{\text{median}_{j \in \tau} \left| \left( \left( \bigotimes_{k=1}^{i-1} e_{a_k}^\top \right) \otimes (e_\xi^\top) \otimes \left( \bigotimes_{k=i+1}^q Z^{k,j} \right) \rho \right) \right|^p}{\sum_{\xi' \in H_i} \text{median}_{j \in \tau} \left| \left( \left( \bigotimes_{k=1}^{i-1} e_{a_k}^\top \right) \otimes (e_{\xi'}^\top) \otimes \left( \bigotimes_{k=i+1}^q Z^{k,j} \right) \rho \right) \right|^p}$$

Which gives a  $O((c \log(n))^{2q})$ -error approximation to the correct sampling probability for a heavy item.

In the second case, with probability  $\gamma_i/\beta_i$ , we choose to not sample a heavy item. In this case, we must now sample a item from  $[n_i] \setminus H_i$ . To do this, we partition  $[n_i]$  randomly into  $\Omega_1, \dots, \Omega_\eta$  for  $\eta = 1/r_3^2$ . Now there are two cases. First suppose that we have

$$\frac{\sum_{j \in [n_i] \setminus H_i} \sum_{\vec{u} \in \Delta(\vec{a}): u_i = j} |\rho_{\vec{u}}|^p}{\sum_{\vec{u} \in \Delta(\vec{a})} |\rho_{\vec{u}}|^p} \leq \Theta(1/r_3^3)$$

Now recall that  $\gamma_i/\beta_i$  was a  $O((c \log(n))^{2q})$ -error estimate of the ratio on the left hand side of the above equation, and  $\gamma_i/\beta_i$  was the probability with which we choose to sample a non-heavy hitter. Since we only repeat the sampling process  $r_3$  times, the probability that we ever sample a non-heavy item in this case is at most  $\Theta(q(c \log(n))^{2q}/r_3^2) < \Theta(q/r_3)$ , taken over all possible repetitions of this sampling in the algorithm. Thus we can safely ignore this case, and condition on the fact that we never sample a non-heavy item in this case. Otherwise,  $\sum_{j \in [n_i] \setminus H_i} \sum_{\vec{u} \in \Delta(\vec{a}): u_i = j} |\rho_{\vec{u}}|^p > \Theta(1/r_3^3) \sum_{\vec{u} \in \Delta(\vec{a})} |\rho_{\vec{u}}|^p$ , and it follows that  $\sum_{\vec{u} \in \Delta(\vec{a}): u_i = j'} |\rho_{\vec{u}}|^p \leq \Theta(1/r_3^5 \sum_{j \in [n_i] \setminus H_i} \sum_{\vec{u} \in \Delta(\vec{a}): u_i = j} |\rho_{\vec{u}}|^p)$  for all  $j' \in [n_i] \setminus H_i$ , since we removed all  $\Theta(1/r_3^3)$  heavy hitters from  $[n_i]$  originally. Thus by Chernoff bounds, with high probability we have that  $\sum_{j \in \Omega_i \setminus H_i} (\sum_{\vec{u} \in \Delta(\vec{a}): u_i = j} |\rho_{\vec{u}}|^p) = \Theta(1/\eta \sum_{j \in [n_i] \setminus H_i} \sum_{\vec{u} \in \Delta(\vec{a}): u_i = j} |\rho_{\vec{u}}|^p)$ , which we can union bound over all repetitions.

Given this, by choosing  $t \sim [\eta]$  uniformly at random, and then choosing  $j \in \Omega_t \setminus H_i$  with probability proportional to its mass in  $\Omega_t \setminus H_i$ , we get a  $\Theta(1)$  approximation of the true sampling probability. Since we do not know its exact mass, we instead sample from the distribution  $\{\frac{\theta_j}{\sum_{j' \in \Omega_t \setminus H_i} \theta_{j'}}\}_{j \in \Omega_t \setminus H_i}$ , where

$$\theta_j = \text{median}_{l \in [\tau]} \left| \left( \left( \bigotimes_{k=1}^{i-1} e_{a_k}^\top \right) \otimes (e_j^\top) \otimes \left( \bigotimes_{k=i+1}^q Z^{k,l} \right) \rho \right) \right|^p$$

Again by Proposition B.7, this gives a  $O((c \log(n))^{2q})$ -error approximation to the correct sampling probability. Note that at each step of sampling a coordinate of  $\vec{a}$  we obtained at most  $O((c \log(n))^{2q})$ -error in the sampling probability. Thus, by oversampling by a  $O((c \log(n))^{2q^2})$  factor, we can obtain the desired sampling probabilities. This completes the proof of correctness. Note that to improve the failure probability to  $1 - \delta$ , we can simply scale  $r_3$  by a factor of  $1/\delta$ .

**Proof of Runtime.** We now analyze the runtime. At every step  $i = 1, 2, \dots, q$  of the sampling, we compute  $v_i^j \leftarrow S^i \left( \left( \bigotimes_{k=1}^{i-1} e_{a_k}^\top \right) \otimes (\mathbb{I}_{n_i}) \otimes \left( \bigotimes_{k=i+1}^q Z^{k,j} \right) \rho \right) \in \mathbb{R}^{n_i}$  for  $j = 1, 2, \dots, \Theta(\log(n))$ . This is equal to

$$S^i \left( \left( \bigotimes_{k=1}^{i-1} (A_k)_{a_k, *} \right) \otimes (A_i) \otimes \left( \bigotimes_{k=i+1}^q Z^{k,j} A_k \right) x' - \left( \bigotimes_{k=1}^{i-1} e_{a_k}^\top \right) \otimes (\mathbb{I}_{n_i}) \otimes \left( \bigotimes_{k=i+1}^q Z^{k,j} b \right) \right)$$

786 We first consider the term inside of the parenthesis (excluding  $S^i$ ). Note that the term  
787  $(\bigotimes_{k=i+1}^q Z^{k,j} A_k)$  was already pre-computed, and is a vector of length at most  $d$ , this this re-  
788 quires a total of  $\tilde{O}(\sum_{i=1}^q \text{nnz}(A_i) + d)$  time. Note that these same values are used for every  
789 sample. Given this pre-computation, we can rearrange the first term to write  $(\bigotimes_{k=1}^{i-1} (A_k)_{a_k,*}) \otimes$   
790  $(A_i) X' (\bigotimes_{k=i+1}^q Z^{k,j} A_k)^\top$  where  $X'$  is a matrix formed from  $x'$  so that  $x'$  is the vectorization of  
791  $X'$  (this is done via reshaping Lemma B.2). The term  $y = X' (\bigotimes_{k=i+1}^q Z^{k,j} A_k)^\top$  can now be  
792 computed in  $O(d)$  time, and then we reshape again to write this as  $(\bigotimes_{k=1}^{i-1} (A_k)_{a_k,*}) Y A_i^\top$  where  $Y$   
793 again is a matrix formed from  $y$ . Observe that  $\zeta = \text{vec}(\bigotimes_{k=1}^{i-1} (A_k)_{a_k,*} Y) \in \mathbb{R}^{d_i}$  can be computed  
794 in time  $O(qd)$ , since each entry is a dot product of a column  $Y_{*,j} \in \mathbb{R}^{d_1 \cdot d_2 \cdots d_{i-1}}$  of  $Y$  with the  
795  $d_1 \cdot d_2 \cdots d_{i-1}$  dimensional vector  $\bigotimes_{k=1}^{i-1} (A_k)_{a_k,*}$ , which can be formed in  $O(d_1 \cdot d_2 \cdots d_{i-1} q)$   
796 time, and there are a total of  $d_i$  columns of  $Y$ .

797 Given this, The first entire term  $S^i(\bigotimes_{k=1}^{i-1} (A_k)_{a_k,*}) \otimes (A_i) \otimes (\bigotimes_{k=i+1}^q Z^{k,j} A_k) x'$  can be rewritten  
798 as  $S^i A_i \zeta$ , where  $\zeta = \zeta_{\vec{a}} \in \mathbb{R}^{d_i}$  can be computed in  $O(dq)$  time for each sample  $\vec{a}$ . Thus if we  
799 recompute the value  $S_i A_i \in \mathbb{R}^{k \times n}$ , where  $k = \tilde{O}(r_3^{16})$ , which can be done in time  $\tilde{O}(\text{nnz}(A_i))$ , then  
800 every time we are sampling the  $i$ -th coordinate of some  $\vec{a}$ , computing the value of  $S^i A_i \zeta_{\vec{a}}$  can be  
801 done in time  $O(k d_i^2) = r_3^{O(1)}$ .

802 We now consider the second term. We do a similar trick, reshaping  $b \in \mathbb{R}^n$  into  $B \in$   
803  $\mathbb{R}^{(n_1 \cdots n_i) \times (n_i \cdots n_q)}$  and writing this term as  $((\bigotimes_{k=1}^{i-1} e_{a_k}^\top) \otimes (\mathbb{I}_{n_i})) B (\bigotimes_{k=i+1}^q Z^{k,j})^\top$  and computing  
804  $b' = B (\bigotimes_{k=i+1}^q Z^{k,j})^\top \in \mathbb{R}^{(n_1 \cdots n_i)}$  in  $\text{nnz}(B) = \text{nnz}(b)$  time. Let  $B' \in \mathbb{R}^{(n_1 \cdots n_{i-1}) \times n_i}$  be such  
805 that  $\text{vec}(B') = b'$ , and we reshape again to obtain  $(\bigotimes_{k=1}^{i-1} e_{a_k}^\top) B' (\mathbb{I}_{n_i}) = (\bigotimes_{k=1}^{i-1} e_{a_k}^\top) B'$  Now note  
806 that so far, the value  $B'$  did not depend on the sample  $\vec{a}$  at all. Thus for each  $i = 1, 2, \dots, q$ ,  $B'$   
807 (which depends only on  $i$ ) can be pre-computed in  $\text{nnz}(b)$  time. Given this, the value  $(\bigotimes_{k=1}^{i-1} e_{a_k}^\top) B'$   
808 is just a row  $B'_{(a_1, \dots, a_k),*}$  of  $B'$  (or a column of  $(B')^\top$ ). We first claim that  $\text{nnz}(B') \leq \text{nnz}(b) =$   
809  $\text{nnz}(B)$ . To see this, note that each entry of  $B'$  is a dot product  $B_{j,*} (\bigotimes_{k=i+1}^q Z^{k,j})^\top$  for some  
810 row  $B_{j,*}$  of  $B$ , and moreover there is a bijection between these dot products and entries of  $B'$ .  
811 Thus for every non-zero entry of  $B'$ , there must be a unique non-zero row (and thus non-zero en-  
812 try) of  $B$ . This gives a bijection from the support of  $B'$  to the support of  $B$  (and thus  $b$ ) which  
813 completes the claim. Since  $S^i(B'_{(a_1, \dots, a_k),*})^\top$  can be computed in  $\tilde{O}(\text{nnz}(B'_{(a_1, \dots, a_k),*}))$  time, it  
814 follows that  $S^i(B'_{(a_1, \dots, a_k),*})^\top$  can be computed for all rows  $(B'_{(a_1, \dots, a_k),*})$  of  $B$  in  $\tilde{O}(\text{nnz}(b))$   
815 time. Given this precomputation, we note that  $(\mathbb{I}_{n_i}) \otimes (\bigotimes_{k=i+1}^q Z^{k,j}) b$  is just  $S^i(B'_{(a_1, \dots, a_k),*})^\top$   
816 for some  $(a_1, \dots, a_k)$ , which has already been pre-computed, and thus requires no addition time per  
817 sample. Thus, given a total of  $\tilde{O}(\sum_{i=1}^q \text{nnz}(A_i) + q \text{nnz}(b) + r_3^{O(1)})$  pre-processing time, for each  
818 sample we can compute  $v_i^j$  for all  $i \in [q]$  and  $j \in [\tau]$  in  $\tilde{O}(r_3^{O(1)})$  time, and thus  $\tilde{O}(r_3^{O(1)})$  time over  
819 all  $r_3$  samples.

820 Given this, the procedure to compute the heavy hitters  $H_{i,j}$  takes  $\tilde{O}(r_3^{16})$  time by Definition B.6 for  
821 each sample and  $i \in [q], j \in [\tau]$ . By a identical pre-computation and rearrangement argument as  
822 above, each  $\beta_i^j$  (and thus  $\beta_i$ ) can be computed in  $\tilde{O}(r_3^{O(1)})$  time per sample after pre-computation.  
823 Now note that  $\gamma_i$  is simply equal to median  $j \in [\tau](\beta_i^j - (\bigotimes_{k=1}^{i-1} e_{a_k}^\top) \otimes (Z_{H_i}^{k,j}) \otimes (\bigotimes_{k=i+1}^q Z^{k,j}) \rho)$ .  
824 Since  $(Z_{H_i}^{k,j})$  is sparse, the above can similar be computed in  $O(d|H_i|) = \tilde{O}(r_3^{O(1)})$  time per sample  
825 after pre-computation. To see this, note that the  $b$  term of  $(\bigotimes_{k=1}^{i-1} e_{a_k}^\top) \otimes (Z_{H_i}^{k,j}) \otimes (\bigotimes_{k=i+1}^q Z^{k,j}) \rho$   
826 can be written as  $(\bigotimes_{k=1}^{i-1} e_{a_k}^\top) B''' (Z_{H_i}^{k,j})^\top$ , where  $B''' \in \mathbb{R}^{n_1 \cdots n_{i-1} \times n_i}$  is a matrix that has already  
827 been pre-computed and does not depend on the given sample. Then this quantity is just the dot  
828 product of a row of  $B'''$  with  $(Z_{H_i}^{k,j})^\top$ , but since  $(Z_{H_i}^{k,j})$  is  $|H_i|$ -sparse, so the claim for the  $b$  term  
829 follows. For the  $(A_1 \otimes \cdots \otimes A_q)$  term, just as we demonstrated in the discussion of computing  $v_i^j$ ,  
830 note that this can be written as  $(\bigotimes_{k=1}^{i-1} (A_k)_{a_k,*}) Y ((A_i)_{H_i,*})^\top$  for some matrix  $Y \in \mathbb{R}^{d_1 \cdots d_i \times d_{i-1}}$   
831 that has already been precomputed. Since  $(A_i)_{H_i,*}$  only has  $O(|H_i|)$  non-zero rows, this whole  
832 product can be computed in time  $O(d|H_i|)$  as needed.

833 Similarly, we can compute the sampling probabilities

$$\Pr[\text{sample } a_i \leftarrow j] = \frac{\text{median}_{j \in \tau} \left| \left( \left( \bigotimes_{k=1}^{i-1} e_{a_k}^\top \right) \otimes (e_\xi^\top) \otimes \left( \bigotimes_{k=i+1}^q Z^{k,j} \right) \rho \right) \right|^p}{\sum_{\xi' \in H_i} \text{median}_{j \in \tau} \left| \left( \left( \bigotimes_{k=1}^{i-1} e_{a_k}^\top \right) \otimes (e_{\xi'}^\top) \otimes \left( \bigotimes_{k=i+1}^q Z^{k,j} \right) \rho \right) \right|^p}$$

834 for each every item  $\zeta \in H_i$  in  $\tilde{O}(r_3^{O(1)})$  time after pre-computation, and note  $|H_i| = \tilde{O}(r_3^{O(1)})$  by  
 835 definition B.6. Thus the total time to sample a heavy hitter in a given coordinate  $i \in [q]$  for each  
 836 sample  $\tilde{O}(r_3^{O(1)})$  per sample, for an overall time of  $\tilde{O}(qr_3^{O(1)})$  over all samples and  $i \in [q]$ .

837 Finally, we consider the runtime for sampling a non-heavy item. Note that  $|\Omega_t| = O(n_i/\eta)$  with  
 838 high probability for all  $t \in [\eta]$  by chernoff bounds. Computing each

$$\theta_j = \text{median}_{l \in [\tau]} \left( \left| \left( \bigotimes_{k=1}^{i-1} e_{a_k}^\top \right) \otimes (e_j^\top) \otimes \left( \bigotimes_{k=i+1}^q Z^{k,l} \right) \rho \right|^p \right)$$

839 takes  $O(qd)$  time after pre-computation, and so we spend a total of  $O(qdn_i/\eta)$  time sampling an  
 840 item from  $\Omega_t \setminus H_i$ . Since we only ever sample a total of  $r_3$  samples, and  $\eta = \Theta(r_3^2)$ , the total time for  
 841 sampling non-heavy hitters over the course of the algorithm in coordinate  $i$  is  $o(n_i) = o(\text{nnz}(A_i))$   
 842 as needed, which completes the proof of the runtime.

843 **Computing the Sampling Probabilities  $\alpha_i$**  The above arguments demonstrate how to sample  
 844 efficiently from the desired distribution. We now must describe how the sampling probabilities  $\alpha_i$   
 845 can be computed. First note, for each sample that is sampled in the above way, at every step we  
 846 compute exactly the probability with which we decide to sample a coordinate to that sample. Thus  
 847 we know exactly the probability that we choose a sample, and moreover we can compute each  $q_i$  in  
 848  $O(d)$  time as in Lemma B.5. Thus we can compute the maximum of  $q_i$  and this probability exactly.  
 849 For each item sampled as a result of the leverage score sampling probabilities  $q_i$  as in Lemma B.5,  
 850 we can also compute the probability that this item was sampled in the above procedure, by using the  
 851 same sketching vectors  $Z^{i,k}$  and count-sketches  $S^i$ . This completes the proof of the Lemma.

852 □

## 853 C Missing Proofs from Section 4

854 In this section, we prove the correctness of our all-pairs regression algorithm 3. Our main theorem,  
 855 Theorem 4.1, relies crucially on the sample routine developed in Section C.1. We first prove the  
 856 theorem which utilizes this routine, and defer the description and proof of the routine to Section  
 857 C.1.

858 Recall first the high level description of our algorithm (given formally in Figure 3). We pick  $S_1, S_2 \in$   
 859  $\mathbb{R}^{k \times n}$  and  $S$  are sparse  $p$ -stable sketches. We then compute  $M = (S_1 \otimes S_2)(F \otimes \mathbf{1} - \mathbf{1} \otimes F) =$   
 860  $S_1 F \otimes S_2 \mathbf{1} - S_1 \mathbf{1} \otimes S_2 F$ , where  $F = [A, b]$ . We then take the  $QR$  decomposition  $M = QR$ . Finally,  
 861 we sample rows of  $(F \otimes \mathbf{1} - \mathbf{1} \otimes F)R^{-1}$  with probability proportional to their  $\ell_p$  norms. This is  
 862 done by the sampling procedure described in Section C.1. Finally, we solve the regression problem  
 863  $\min_x \|\Pi(\bar{A}x - \bar{b})\|_p$ , where  $\Pi$  is the diagonal row-sampling matrix constructed by the sampling  
 864 procedure.

865 We begin by demonstrating that  $S_1 \otimes S_2$  is a poly( $d$ ) distortion embedding for the column span of  
 866  $[\bar{A}, \bar{b}]$ .

867 **Lemma C.1.** *Let  $S_1, S_2 \in \mathbb{R}^{k \times n}$  be sparse  $p$ -stable transforms, where  $k = \text{poly}(d/(\epsilon\delta))$ . Then for*  
 868 *all  $x \in \mathbb{R}^{d+1}$ , with probability  $1 - \delta$  we have*

$$1/O(d^4 \log^4 d) \|\bar{A}x - \bar{b}\|_p \leq \|(S_1 \otimes S_2)[\bar{A}, \bar{b}]x\|_p \leq O(d^2 \log^2 d) \|\bar{A}x - \bar{b}\|_p$$

869 *Proof.* Let  $F = [A, b]$ . Then a basis for the columns of  $[\bar{A}, \bar{b}]$  is given by  $F \otimes \mathbf{1} - \mathbf{1} \otimes F$ . We first  
 870 condition on both  $S_1, S_2$  being a low-distortion embedding for the  $d + 2$  dimensional column-span  
 871 of  $[F, \mathbf{1}]$ . Note that this holds with large constant probability by 2.3.

872 So for any  $x \in \mathbb{R}^{d+1}$ , we first show the upper bound

$$\begin{aligned}
\|(S_1 \otimes S_2)(F \otimes \mathbf{1} - \mathbf{1} \otimes F)x\|_p &= \|(S_1 F \otimes S_2 \mathbf{1})x - (S_1 \mathbf{1} \otimes S_2 F)\|_p \\
&= \|S_1 F x \mathbf{1}^\top S_2^\top - S_1 \mathbf{1} x^\top F^\top S_2^\top\|_p \\
&= \|S_1 (F x \mathbf{1}^\top - \mathbf{1} x^\top F^\top) S_2^\top\|_p \\
&\leq O(d \log d) \|(F x \mathbf{1}^\top - \mathbf{1} x^\top F^\top) S_2^\top\|_p \\
&\leq O(d^2 \log^2 d) \|F x \mathbf{1}^\top - \mathbf{1} x^\top F^\top\|_p \\
&= O(d^2 \log^2 d) \|(F \otimes \mathbf{1} - \mathbf{1} \otimes F)x\|_p
\end{aligned}$$

Where the first equality follows by properties of the Kronecker product [VL00], the second by reshaping Lemma B.2. The first inequality follows from the fact that each column of  $(F x \mathbf{1}^\top - \mathbf{1} x^\top F^\top) S_2^\top$  is a vector in the column span of  $[F, \mathbf{1}]$ , and then using that  $S_1$  is a low distortion embedding. The second inequality follows from the fact that each row of  $(F x \mathbf{1}^\top - \mathbf{1} x^\top F^\top)$  is a vector in the column span of  $[F, \mathbf{1}]$ , and similarly using that  $S_2$  is a low distortion embedding. The final inequality follows from reshaping. Using a similar sequence of inequalities, we get the matching lower bound as desired.  $\square$

We now prove our main theorem.

**Theorem 4.1** *Given  $A \in \mathbb{R}^{n \times d}$  and  $b \in \mathbb{R}^n$ , for  $p \in [1, 2]$  there is an algorithm for the All-Pairs Regression problem that outputs  $\hat{x} \in \mathbb{R}^d$  such that with probability  $1 - \delta$  we have*

$$\|\bar{A}\hat{x} - \bar{b}\|_p \leq (1 + \epsilon) \min_{x \in \mathbb{R}^d} \|\bar{A}x - \bar{b}\|_p$$

Where  $\bar{A} = A \otimes \mathbf{1} - \mathbf{1} \otimes A \in \mathbb{R}^{n^2 \times d}$  and  $\bar{b} = b \otimes \mathbf{1} - \mathbf{1} \otimes b \in \mathbb{R}^{n^2}$ . For  $p < 2$ , the running time is  $\tilde{O}(nd + (d/(\epsilon\delta))^{O(1)})$ , and for  $p = 2$  the running time is  $O(\text{nnz}(A) + (d/(\epsilon\delta))^{O(1)})$ .

*Proof.* We first consider the case of  $p = 2$ . Here, we can use the fact that the TENSORSKETCH random matrix  $S \in \mathbb{R}^{k \times n}$  is a subspace embedding for the column span of  $[\bar{A}, \bar{b}]$  when  $k = \Theta(d/\epsilon^2)$  [DSSW18], meaning that  $\|S[\bar{A}, \bar{b}]\|_2 = (1 \pm \epsilon)\|[\bar{A}, \bar{b}]\|_2$  for all  $x \in \mathbb{R}^{d+1}$  with probability  $9/10$ . Moreover,  $S\bar{A}$  and  $S\bar{b}$  can be computed in  $O(\text{nnz}(A) + \text{nnz}(b)) = O(\text{nnz}(A))$  by [DSSW18] since they are the difference of Kronecker products. As a result, we can simply solve the regression problem  $\hat{x} = \arg \min_x \|S\bar{A}x - S\bar{b}\|_2$  in  $\text{poly}(kd)$  time to obtain the desired  $\hat{x}$ .

For  $p < 2$ , we use the algorithm in Figure 3, where the crucial leverage score sampling procedure to obtain  $\Pi$  in step 7 of Figure 3 is described in Lemma 4.2. Our high level approach follows the general  $\ell_p$  sub-space embedding approach of [DDH<sup>+</sup>09]. Namely, we first compute a low-distortion embedding  $(S_1 \otimes S_2)(F \otimes \mathbf{1} - \mathbf{1} \otimes F)$ . By Lemma C.1, using sparse-p stable transformations  $S_1, S_2$ , we obtain the desired  $\text{poly}(d)$  distortion embedding into  $\mathbb{R}^{k^2}$ , where  $k = \text{poly}(d/\epsilon)$ . Note that computing  $(S_1 \otimes S_2)(F \otimes \mathbf{1} - \mathbf{1} \otimes F)$  can be done in  $O(\text{nnz}(A) + \text{nnz}(b) + n)$  time using the fact that  $(S_1 \otimes S_2)(F \otimes \mathbf{1}) = S_1 F \otimes S_2 \mathbf{1}$ . As shown in [DDH<sup>+</sup>09], it follows that  $M = (F \otimes \mathbf{1} - \mathbf{1} \otimes F)R^{-1}$  is an  $\ell_p$  well-conditioned basis for the column span of  $(F \otimes \mathbf{1} - \mathbf{1} \otimes F)$  (see definition 2.5). Then by Theorem 5 of [DDH<sup>+</sup>09], if we let  $\hat{\Pi}$  be the diagonal row sampling matrix such that  $\hat{\Pi}_{i,i} = 1/q_i^{1/p}$  for each  $i$  with probability  $q_i \geq \min\{1, r\|M_{i,*}\|_p^p/\|M\|_p^p\}$  (and  $\hat{\Pi}_{i,i} = 0$  otherwise) for  $r = \text{poly}(d \log(1/\delta)/\epsilon)$ , then with probability  $1 - \delta$  we have  $\|\hat{\Pi}(F \otimes \mathbf{1} - \mathbf{1} \otimes F)x\|_p = (1 \pm \epsilon)\|(F \otimes \mathbf{1} - \mathbf{1} \otimes F)x\|_p$  for all  $x \in \mathbb{R}^{d+1}$ . First assume that we had such a matrix.

Since  $(\bar{A}x - \bar{b})$  is in the column span of  $(F \otimes \mathbf{1} - \mathbf{1} \otimes F)$  for any  $x \in \mathbb{R}^{d+1}$ , it follows that  $\|\hat{\Pi}(\bar{A}x - \bar{b})\|_p = (1 \pm \epsilon)\|(\bar{A}x - \bar{b})\|_p$  for all  $x \in \mathbb{R}^d$ , which completes the proof of correctness. By Lemma 4.2, we can obtain a row sampling matrix  $\Pi$  in time  $\tilde{O}(nd + \text{poly}(d/\epsilon))$ , except that the entries of  $\Pi$  are instead equal to either 0 or  $1/\tilde{q}_i^{1/p}$  where  $\tilde{q}_i = (1 \pm \epsilon^2)q_i$ . Now let  $\hat{\Pi}$  be the idealized row sampling matrices from above, with entries either 0 or  $1/q_i^{1/p}$  as needed for Theorem 5 of [DDH<sup>+</sup>09]. Note that for any matrix  $Z$  each row of  $\hat{\Pi}Zx$  is equal to  $\Pi Zx$  times some constant  $1 - \epsilon^2 < c < 1 + \epsilon^2$ . It follows that  $\|\Pi(\bar{A}x - \bar{b})\|_p = (1 \pm \epsilon^2)\|\hat{\Pi}(\bar{A}x - \bar{b})\|_p$  for all  $x \in \mathbb{R}^d$ , and thus



910 the objective function is changed by at most a  $(1 \pm \epsilon^2)$  term, which is simply handled by a constant  
911 factor rescaling of  $\epsilon$ .

912 Finally, we can solve the sketched regression problem  $\|\Pi(\bar{A}x - \bar{b})\|_p$  which has  $\text{poly}(d/\epsilon)$  con-  
913 straints and  $d$  variables in time  $\text{poly}(d/\epsilon)$  using linear programming for  $p = 1$  (see [CLS19] for the  
914 state of the art linear program solver), or more generally interior point methods for convex program-  
915 ming for  $p > 1$  (see [BCLL18] for the state of the art  $\ell_p$  solver). Finally, the failure probability bound  
916 holds by union bounding over all the aforementioned results, and noting that the lowest probability  
917 event was the even that  $S_1 \otimes S_2$  was a low distortion embedding via Lemma C.1. This completes  
918 the proof of the theorem.

919 □

## 920 C.1 Proof of Fast Sampling Lemma 4.2

921 We now provide a full proof of the main technical lemma of Section 4. The sampling algorithm is  
922 given formally in Algorithm 5. The following proof of Lemma 4.2 analyzes each step in the process,  
923 demonstrating both correctness and the desired runtime bounds.

924 **Lemma 4.2** *Given  $R \in \mathbb{R}^{(d+1) \times (d+1)}$  and  $F = [A, b] \in \mathbb{R}^{n \times (d+1)}$ , there is an algorithm that, with  
925 probability  $1 - \delta$  for any  $\delta > n^{-c}$  for any constant  $c$ , produces a diagonal matrix  $\Pi \in \mathbb{R}^{n^2 \times n^2}$  such  
926 that  $\Pi_{i,i} = 1/\tilde{q}_i^{1/p}$  with probability  $q_i \geq \min\{1, r\|M_{i,*}\|_p^p/\|M\|_p^p\}$  and  $\Pi_{i,i} = 0$  otherwise, where  
927  $r = \text{poly}(d/\epsilon)$  and  $M = (F \otimes \mathbf{1} - \mathbf{1} \otimes F)R^{-1}$ , and  $\tilde{q}_i = (1 \pm \epsilon^2)q_i$  for all  $i \in [n^2]$ . The total time  
928 required is  $\tilde{O}(\text{nnz } A + \text{poly}(d/\epsilon))$ .*

929 *Proof.* Our proof proceeds in several steps. We analyze the runtime concurrently with out analysis  
930 of correctness.

931 **Reducing the number of Columns of  $R^{-1}$**  We begin by generating a matrix  $G \in \mathbb{R}^{(d+1) \times \xi}$  of  
932 i.i.d.  $\mathcal{N}(0, 1/\sqrt{\xi})$  Gaussian random variables. We then compute  $Y \leftarrow R^{-1}G$  in  $\tilde{O}(d^2)$  time. We  
933 first claim that it suffices to instead  $\ell_p$  sample rows of  $C = (F \otimes \mathbf{1} - \mathbf{1} \otimes F)Y = MG$ . Note that  
934 each entry  $|C_{i,j}|^p$  is distributed as  $g^p\|M_{i,*}\|_2^p$  where  $G \sim \mathcal{N}(0, 1/\sqrt{\xi})$  Gaussian, which holds by the  
935 2-stability of Gaussian random variables. Note that  $\mathbb{E}[|g|^p] = \Theta(1/\xi)$ , so  $\mathbb{E}[\|C_{i,*}\|_p^p] = \|M_{i,*}\|_2^p$ ,  
936 and by sub-exponential concentration (see Chapter 2 of [Wai19]), we have that  $\|C_{i,*}\|_p^p = (1 \pm$   
937  $1/10)\|M_{i,*}\|_2^p$  with probability  $1 - 1/\text{poly}(n)$ , and we can union bound over this holding for all  
938  $i \in [n^2]$ . By relationships between the  $p$  norms, we have  $\|M_{i,*}\|_p^p/d < \|M_{i,*}\|_2^p < \|M_{i,*}\|_p^p$ , thus  
939 this changes the overall sampling probabilities by a factor between  $\Theta(1/d^2)$  and  $\Theta(d^2)$ . Thus, we  
940 can safely oversample by this factor (absorbing it into the value of  $r$ ) to compensate for this change  
941 in sampling probabilities.

942 **Sampling a row from  $C$ .** To sample a row from  $C$ , the approach will be to sample an entry  
943  $C_{i,j}$  of  $C$  with probability proportional to  $\|C_{i,j}\|_p^p/\|C\|_p^p$ . For every  $(i, j)$  sampled, we sample  
944 the entire  $i$ -th row of  $j$ , so that the  $j$ -th row is indeed sampled with probability proportional to its  
945 norm. Thus, it suffices to sample entries of  $C$  such that each  $C_{i,j}$  is chosen with probability at  
946 least  $\min\{1, r\|C_{i,j}\|_p^p/\|C\|_p^p\}$ . First note that the  $i$ -th column of  $C = (F \otimes \mathbf{1} - \mathbf{1} \otimes F)Y$  can be  
947 rearranged into a  $n \times n$  matrix via Lemma B.2, given by  $(FY_{*,i}\mathbf{1}^\top - \mathbf{1}Y_{*,i}^\top F^\top)$ . To  $\ell_p$  sample a  
948 coordinate from  $C$ , it suffices to first  $\ell_p$  sample a column of one of the above matrices, and then  $\ell_p$   
949 sample an entry from that column.

950 To do this, we first compute  $FY \in \mathbb{R}^{n \times \xi}$ , which can be done in time  $\tilde{O}(\text{nnz } A)$  because  $Y$  only has  
951  $\xi = \Theta(\log(n))$  columns. We then compute  $Z(FY_{*,i}\mathbf{1}^\top - \mathbf{1}Y_{*,i}^\top F^\top) \in \mathbb{R}^{1 \times n}$  for all  $i \in [d]$ , where  
952  $Z \in \mathbb{R}^{1 \times n}$  is a fixed vector of i.i.d.  $p$ -stable random variables. Once  $FY$  has been computed, for  
953 each  $i \in [\xi]$  it takes  $O(n)$  time to compute this  $n$ -dimensional vector, thus the total time required  
954 to compute all  $\xi$  vectors is  $\tilde{O}(n)$ . We repeat this process  $t = O(\log(n))$  times with different  $p$ -  
955 stable vectors  $Z^1, \dots, Z^t$ , and take the median of each coordinate of  $Z^j(FY_{*,i}\mathbf{1}^\top - \mathbf{1}Y_{*,i}^\top F^\top) \in$   
956  $\mathbb{R}^n$ ,  $j \in [t]$ , divided by the median of the  $p$ -stable distribution (which can be approximated to  
957  $(1 \pm \epsilon)$  error in  $\text{poly}(1/\epsilon)$  time, see Appendix A.2 of [KNW10] for details of this). This is done  
958 in Step 7 of Algorithm 5. It is standard this this gives a  $(1 \pm 1/10)$  approximation the the norm



---

**Algorithm 5** Algorithm to  $\ell_p$  sample  $\Theta(r)$  rows of  $M = (F \otimes \mathbf{1} - \mathbf{1} \otimes F)R^{-1}$

---

- 1: **procedure**  $\ell_p$  SAMPLE( $F = [A, b] \in \mathbb{R}^{n \times d}$ ,  $R^{-1} \in \mathbb{R}^{d+1 \times d+1}$ ,  $r$ )
- 2:   Generate a matrix  $G \in \mathbb{R}^{d+1 \times \xi}$  of i.i.d.  $\mathcal{N}(0, 1/\sqrt{\xi})$  Gaussian random variables, with  $\xi = \Theta(\log(n))$
- 3:    $Y \leftarrow R^{-1}G \in \mathbb{R}^{d+1 \times \xi}$
- 4:    $C \leftarrow (F \otimes \mathbf{1} - \mathbf{1} \otimes F)Y$
- 5:   Reshape  $i$ -th column  $C_{*,i}$  into  $(FY_{*,i}\mathbf{1}^\top - \mathbf{1}(Y_{*,i})^\top F^\top) \in \mathbb{R}^{n \times n}$
- 6:   Generate  $Z \in \mathbb{R}^{t \times n}$  i.i.d.  $p$ -stable for  $t = \Theta(\log(n))$  ▷ Definition 2.1
- 7:   For all  $(i, l) \in [\xi] \times [n]$ , set

$$\sigma_{i,l} \leftarrow \text{median}_{\tau \in [t]} \left( \frac{|(Z(FY_{*,i}\mathbf{1}^\top - \mathbf{1}(Y_{*,i})^\top F^\top))_{\tau,l}|^p}{(\text{median}(\mathcal{D}_p))^p} \right)$$

▷ Indyk Estimator [Ind06]

- 8:   Set  $W^{(i,l)} \leftarrow (FY_{*,i}\mathbf{1}^\top - \mathbf{1}Y_{*,i}^\top F^\top)_{*,l} = FY_{*,i} - \mathbf{1}(FY)_{l,i} \in \mathbb{R}^n$
- 9:   **for**  $j = 1, \dots, \Theta(r)$  **do**
- 10:     Sample  $(i', l')$  from distribution  $\sigma_{i,l} / (\sum_{i', l'} \sigma_{i', l'})$ .
- 11:   **end for**
- 12:    $T \leftarrow$  multi-set of samples  $(i, l)$
- 13:   Generate  $S_0 \in \mathbb{R}^{k \times n}$   $S \in \mathbb{R}^{k' \times n}$  count-sketches for heavy hitters with  $k = r^{O(1)}$ ,  $k' = k^{O(1)}$ . ▷ Definition B.6
- 14:   Generate  $u_1, \dots, u_n$  i.i.d. exponential variables.
- 15:    $D \leftarrow \text{Diag}(1/u_1^{1/p}, \dots, 1/u_n^{1/p}) \in \mathbb{R}^{n \times n}$ .
- 16:   **for each** sample  $(i, l) \in T$  **do**
- 17:     Compute  $S_0 W^{(i,l)}$  and obtain set of heavy hitters  $Q_0^{(i,l)} \subset [n]$
- 18:     Compute  $W_j^{(i,l)}$  exactly for all  $j \in Q_0^{(i,l)}$ , to obtain true heavy hitters  $H^{(i,l)}$ .
- 19:     Compute

$$\alpha_{i,l} \leftarrow \text{median}_{\tau \in [t]} \left( \frac{|Z_{\tau,*} W^{(i,l)} - \sum_{\zeta \in H^{(i,l)}} Z_{\tau,\zeta} W_\zeta^{(i,l)}|^p}{(\text{median}(\mathcal{D}_p))^p} \right)$$

- 20:     **if** With prob  $1 - \alpha_{i,l}/\sigma_{i,l}$ , sample a heavy item  $j^* \leftarrow j$  **then**
  - 21:       Sample a heavy item  $j^* \leftarrow j$  from the distribution  $|W_j^{(i,l)}|^p / \sum_{j \in H^{(i,l)}} |W_j^{(i,l)}|^p$ .
  - 22:       **return** The row  $((l-1)n + j^*)$  ▷ Note that  $C_{(l-1)n+j^*,*}$  contains  $W_{j^*}^{(i,l)}$
  - 23:     **else**
  - 24:       Randomly partition  $[n]$  into  $\Omega_1, \Omega_2, \dots, \Omega_\eta$  with  $\eta = \Theta(r^4/\epsilon^4)$ .
  - 25:       Sample  $t \sim [\eta]$  uniformly at random.
  - 26:       Compute  $S(DW^{(i,l)})_{\Omega_t \setminus H^{(i,l)}}$ , and set  $Q^{(i,l)} \subset \Omega_t \setminus H^{(i,l)}$  of heavy hitters.
  - 27:        $j^* \leftarrow \arg \max_{j \in Q^{(i,l)}} (DW^{(i,l)})_j$
  - 28:       **return** The row  $((l-1)n + j^*)$  ▷ Note that  $C_{(l-1)n+j^*,*}$  contains  $W_{j^*}^{(i,l)}$
  - 29:     **end if**
  - 30:   **end for**
  - 31: **end procedure**
- 

959  $\|(FY_{*,i}\mathbf{1}^\top - \mathbf{1}Y_{*,i}^\top F^\top)_{*,l}\|_p$  for each  $i \in [d]$ ,  $l \in [n]$  with probability  $1 - 1/\text{poly}(n)$  (See the Indyk  
960 median estimator [Ind06]).

961 Now let  $\sigma_{i,l}$  be our estimate of the norm  $\|(FY_{*,i}\mathbf{1}^\top - \mathbf{1}Y_{*,i}^\top F^\top)_{*,l}\|_p$ , for all  $i \in [\xi]$  and  $l \in$   
962  $[n]$ . We now sample a columns  $(i, l) \in [\xi] \times [n]$ , where each  $(i, l)$  is chosen with probability  
963  $\sigma_{i,l} / (\sum_{i', l'} \sigma_{i', l'})$ . We repeat this process  $\Theta(r)$  times, to obtain a *multi-set*  $T \subset [\xi] \times [n]$  of sampled  
964 columns  $(i, l)$ . We stress that  $T$  is a multi-set, because the same column  $(i, l)$  may have been chosen

for multiple samples, and each time it is chosen we must independently sample one of the entries of that column. For any  $(i, l) \in T$ , we define  $W^{(i,l)} = (FY_{*,i} \mathbf{1}^\top - \mathbf{1} Y_{*,i}^\top F^\top)_{*,l} = (FY_{*,i} - \mathbf{1}(FY)_{l,i})$ .

**$\ell_p$  Sampling an entry from  $W^{(i,l)}$ .** Now fix any  $(i, l) \in T$ . We show how to  $\ell_p$  sample an entry from the vector  $W^{(i,l)} \in \mathbb{R}^n$ . In other words, for a given  $j \in [n]$ , we want to sample  $W_j^{(i,l)} \in [n]$  with probability at least  $r|W_j^{(i,l)}|^p / \|W^{(i,l)}\|_p^p$ . We do this in two steps. First, let  $S_0 \in \mathbb{R}^{k \times n}$  be the count-sketch for heavy hitters of definition B.6, where  $k = \text{poly}(r)$ . Note that we can compute  $S_0 FY$  and  $S_0 \mathbf{1}$  in time  $\tilde{O}(n)$ , since  $FY \in \mathbb{R}^{n \times \xi}$ . Once this is done, for each  $(i, l) \in T$  we can compute  $S_0 W^{(i,l)}$  in  $O(k)$  time by computing  $(S_0 \mathbf{1}(FY)_{l,i})$  (note that  $FY$  and  $S_0 \mathbf{1}$  are already computed), and subtracting it off from the  $i$ -th column of  $S_0 FY$ , so the total time is  $\tilde{O}(n + \text{poly}(d/\epsilon))$  to compute  $S_0 W^{(i,l)}$  for all  $(i, l) \in T$ . Now we can obtain the set  $Q_0^{(i,l)} \subset [n]$  containing all the  $\tilde{\Omega}(1/\sqrt{k})$  heavy hitters in  $W^{(i,l)}$  with high probability. We can then explicitly compute the value of  $W_j^{(i,l)}$  for all  $j \in Q_0^{(i,l)}$ , and exactly compute the set

$$H^{(i,l)} = \left\{ j \in [n] \mid |W_j^{(i,l)}|^p > \beta/r^{16} \|W^{(i,l)}\|_p^p \right\},$$

all in  $\tilde{O}(k)$  time via definition B.6, where  $\beta > 0$  is a sufficiently small constant (here we use the fact that  $|x|_p \geq |x|_2$  for  $p \leq 2$ ). Note that we use the same sketch  $S_0$  to compute all sets  $Q_0^{(i,l)}$ , and union bound the event that we get the heavy hitters over all  $\text{poly}(d/\epsilon)$  trails.

We are now ready to show how we sample an index from  $W^{(i,l)}$ . First, we estimate the total  $\ell_p$  norm of the items in  $[n] \setminus H^{(i,l)}$  (again with the Indyk median estimator), and call this  $\alpha_{(i,l)}$  as in Algorithm 5, which can be computed in  $O(|H^{(i,l)}|)$  additional time (by subtracting off the  $|H^{(i,l)}|$  coordinates  $ZW_\zeta^{(i,l)}$  for all heavy hitters  $\zeta \in H^{(i,l)}$  from our estimate  $\sigma_{(i,l)}$ ), and with probability  $\alpha_{(i,l)}/\sigma_{(i,l)}$ , we choose to sample one of the items of  $H^{(i,l)}$ , which we can then sample from the distribution  $|W_j^{(i,l)}|^p / (\sum_{j \in H^{(i,l)}} |W_j^{(i,l)}|^p)$ . Since all the  $\sigma_{(i,l)}, \alpha_{(i,l)}$ 's were constant factor approximations, it follows that we sampled such an item with probability  $\Omega(r|W_{j'}^{(i,l)}|^p / \|C\|_p^p)$  as needed. Otherwise, we must sample an entry from  $[n] \setminus H^{(i,l)}$ . To do this, we first randomly partition  $[n]$  into  $\eta = \Theta(r^4/\epsilon^4)$  subsets  $\Omega_1, \Omega_2, \dots, \Omega_\eta$ .

We now make the same argument made in the proof of Lemma B.9, considering two cases. In the first case, the  $\ell_p$  mass of  $[n] \setminus H^{(i,l)}$  drops by a  $1/r^2$  factor after removing the heavy hitters. In this case,  $\alpha_{(i,l)}/\sigma_{(i,l)} = O(1/r^2)$ , thus we will never *not* sample a heavy hitter with probability  $1 - O(1/r)$ , which we can safely ignore. Otherwise, the  $\ell_p$  drops by less than a  $1/r^2$  factor, and it follows that all remaining items must be at most a  $\beta/r^{14}$  heavy hitter over the remaining coordinates  $[n] \setminus H^{(i,l)}$  (since if they were any larger, they would be  $\beta/r^{16}$  heavy hitters in  $[n]$ , and would have been removed in  $H^{(i,l)}$ ). Thus we can assume we are in the second case. So by Chernoff bounds, we have  $\sum_{j \in \Omega_t} |W_j^{(i,l)}|_p = \Theta(\frac{1}{\eta} \sum_{j \in [n] \setminus H^{(i,l)}} |W_j^{(i,l)}|_p)$  with probability greater than  $1 - \exp(-\Omega(r))$ . We can then union bound over this event occurring for all  $t \in [\eta]$  and all  $(i, l) \in T$ . Given this, if we uniformly sample a  $t \sim [\eta]$ , and then  $\ell_p$  sample a coordinate  $j \in \Omega_t$ , we will have sampled this coordinate with the correct probability up to a constant factor. We now sample such a  $t$  uniformly from  $\eta$ .

To do this, we generate a diagonal matrix  $D \in \mathbb{R}^{n \times n}$ , where  $D_{i,i} = 1/u_i^{1/p}$ , where  $u_1, \dots, u_n$  are i.i.d. exponential random variables. For any set  $\Gamma \subset [n]$ , let  $D_\Gamma$  be  $D$  with all diagonal entries  $(j, j)$  such that  $j \notin \Gamma$  set equal to 0. Now let  $S \in \mathbb{R}^{k' \times n}$  be a second instance of count-sketch for heavy hitters of definition B.6, where we set  $k' = \text{poly}(k)$  from above. It is known that returning  $j^* = \arg \max_{j \in \Omega_t \setminus H^{(i,l)}} |(DW^{(i,l)})_j|$  is a perfect  $\ell_p$  sample from  $\Omega_t \setminus H^{(i,l)}$  [JW18]. Namely,  $\Pr[j^* = j] = |W_j^{(i,l)}|^p / \|W_{\Omega_t \setminus H^{(i,l)}}\|_p^p$  for any  $j \in \Omega_t \setminus H^{(i,l)}$ . Thus it will suffice to find this  $j^*$ . To find  $j^*$ , we compute  $S(DW)_{\Omega_t \setminus H^{(i,l)}}$ . Note that since  $FY$  has already been computed, to do this we need only compute  $SD_{\Omega_t \setminus H^{(i,l)}} FY_{*,i}$  and  $SD_{\Omega_t \setminus H^{(i,l)}} \mathbf{1}(FY)_{\ell,i}$ , which takes total time  $\tilde{O}(|\Omega_t \setminus H^{(i,l)}|) = \tilde{O}(n/\eta)$ . We then obtain a set  $Q^{(i,l)} \subset \Omega_t \setminus H^{(i,l)}$  which contains all  $j$  with  $|(DW^{(i,l)})_j| \geq \tilde{\Omega}(1/\sqrt{k'}) \|(DW)_{\Omega_t \setminus H^{(i,l)}}\|_2$ .

1011 As noted in [JW18], the value  $\max_{j \in \Omega_t \setminus H^{(i,l)}} |(DW^{(i,l)})_j|$  is distributed identically to  
 1012  $\|W_{\Omega_t \setminus H^{(i,l)}}\|_p / u^{1/p}$  where  $u$  is again an exponential random variable. Since exponential random  
 1013 variables have tails that decay like  $e^{-\Omega(x)}$ , it follows that with probability  $1 - \exp(-\Omega(r))$  that  
 1014 we have  $\max_{j \in \Omega_t \setminus H^{(i,l)}} |(DW^{(i,l)})_j| = \Omega(\|W_{\Omega_t \setminus H^{(i,l)}}\|_p / r)$ , and we can then union bound over  
 1015 the event that this occurs for all  $(i, l) \in T$  and  $\Omega_t$ . Given this it follows that  $(DW^{(i,l)})_{j^*} =$   
 1016  $\Omega(\|W_{\Omega_t \setminus H^{(i,l)}}\|_p / r)$ . Next, for any constant  $c \geq 2$ , by Proposition 1 of [JW18], we have  
 1017  $\|((DW)_{\Omega_t \setminus H^{(i,l)}})_{\text{tail}(c \log(n))}\|_2 = \tilde{O}(\|W_{\Omega_t \setminus H^{(i,l)}}\|_p)$  with probability  $1 - n^{-c}$ , where for a vec-  
 1018 tor  $x$ ,  $x_{(\overline{t})}$  is  $x$  but with the top  $t$  largest (in absolute value) entries set equal to 0. Since there  
 1019 are at most  $c \log(n)$  coordinates in  $(DW)_{\Omega_t \setminus H^{(i,l)}}$  not counted in  $((DW)_{\Omega_t \setminus H^{(i,l)}})_{\text{tail}(c \log(n))}$ ,  
 1020 and since  $(DW)_{j^*}$  is the largest coordinate in all of  $(DW)_{\Omega_t \setminus H^{(i,l)}}$ , by putting together all of  
 1021 the above it follows that  $(DW)_{j^*}$  is a  $\tilde{\Omega}(1/r)$ -heavy hitter in  $(DW)_{\Omega_t \setminus H^{(i,l)}}$ . Namely, that  
 1022  $|(DW)_{j^*}| \geq \tilde{\Omega}(\|(DW)_{\Omega_t \setminus H^{(i,l)}}\|_2 / r)$ . Thus, we conclude that  $j^* \in Q^{(i,l)}$ .  
 1023 Given that  $j^* \in Q^{(i,l)}$ , we can then compute the value  $(DW^{(i,l)})_j = D_{j,j}(FY_{j,i} - FY_{l,i})$  in  $O(1)$   
 1024 time to find the maximum coordinate  $j^*$ . Since  $|Q^{(i,l)}| = O(k') = O(\text{poly}(d/\epsilon))$ , it follows that  
 1025 the total time required to do this is  $\tilde{O}(n/\eta + \text{poly}(d/\epsilon))$ . Since we repeat this process for each  
 1026  $(i, l) \in T$ , and  $|T| = \Theta(r)$  whereas  $\eta = \Theta(r^4)$ , it follows that the total runtime for this step is  
 1027  $\tilde{O}(n/r^3 + \text{poly}(d/\epsilon))$ . By [JW18], the result is a perfect  $\ell_p$  sample from  $(DW)_{\Omega_t \setminus H^{(i,l)}}$ , which is  
 1028 the desired result. To complete the proof, we note that the only complication that remains is that  
 1029 we utilize the same scaling matrix  $D$  to compute the sampled used in each of the columns  $W^{(i,l)}$   
 1030 for each  $(i, l) \in T$ . However, note that for  $t \neq t'$ , we have that  $D_{\Omega_t}$  and  $D_{\Omega_{t'}}$  are independent  
 1031 random variables. Thus it suffices to condition on the fact that the  $t \in [\eta]$  that is sampled for each  
 1032 of the  $|T|$  repetitions of sampling a  $\Omega_t$  are distinct. But this occurs with probability at least  $1/r$ ,  
 1033 since  $|T| = \Theta(r)$  and  $\eta = \Theta(r^4)$ . Conditioned on this, all  $|T|$  samples are independent, and each  
 1034 sample is an entry  $C_{i,j}$  of  $C$  such that the probability that a given  $(i, j)$  is chosen is  $|C_{i,j}|^p / \|C\|_p^p$ .  
 1035 Repeating this sampling  $\Theta(r)$  times, we get that each  $C_{i,j}$  is sampled with probability at least  
 1036  $\min\{1, r|C_{i,j}|^p / \|C\|_p^p\}$ , which completes the proof of correctness. Note that the dominant runtime  
 1037 of the entire procedure was  $\tilde{O}(\text{nnz}(A) + \text{poly}(d/\epsilon))$  as stated, and the probability of success was  
 1038  $1 - \exp(-r) + 1/\text{poly}(n)$ , which we can be amplified to any  $1 - \delta$  for  $\delta > 1/n^c$  for some constant  
 1039  $c$  by increasing the value of  $r$  by  $\log(1/\delta)$  and the number of columns of the sketch  $G$  to  $\log(1/\delta)$ ,  
 1040 which does not effect the  $\tilde{O}(\text{nnz}(A) + \text{poly}(d/\epsilon))$  runtime.

1041 **Computing approximations  $\tilde{q}_i$  for  $q_i$ .** It remains now how to compute the approximate sampling  
 1042 probabilities  $\tilde{q}_i$  for  $\Theta(r)$  rows of  $C$  that were sampled. Note that to sample an entry, in  $C$ , we first  
 1043 sampled the  $n \times 1$  submatrix  $W^{(i,l)}$  of  $C$  which contained it, where the probability that we sample  
 1044 this submatrix is known to us. Next, if the entry of  $C$  was a heavy hitter in  $W^{(i,l)}$ , we exactly  
 1045 compute the probability that we sample this entry, and sample it with this probability. If the entry  $j$   
 1046 of  $W^{(i,l)}$  is not a heavy hitter, we first sample an  $\Omega_t$  uniformly with probability exactly  $1/\eta$ . The last  
 1047 step is sampling a coordinate from  $W_{\Omega_t \setminus H^{(i,l)}}^{(i,l)}$  via exponential scaling. However, we do not know  
 1048 the exact probability of this sampling, since this will be equal to  $|W_j^{(i,l)}|^p / \|W_{\Omega_t \setminus H^{(i,l)}}^{(i,l)}\|_p^p$ , and we do  
 1049 not know  $\|W_{\Omega_t \setminus H^{(i,l)}}^{(i,l)}\|_p^p$  exactly. Instead, we compute it approximately to error  $(1 \pm \epsilon^2)$  as follows.  
 1050 For each  $(i, l) \in T$  and  $\alpha = 1, 2, \dots, \Theta(\log(n)/\epsilon^4)$ , we compute  $Z^{(\alpha)} W_{\Omega_t \setminus H^{(i,l)}}^{(i,l)}$ , where  $Z \in$   
 1051  $\mathbb{R}^{1 \times |\Omega_t \setminus H^{(i,l)}|}$  is a vector of  $p$ -stable random variables. Again, we use the Indyk median estimator  
 1052 [Ind06], taking the median of these  $\Theta(\log(n)/\epsilon^4)$  repetitions, to obtain an estimate of  $\|W_{\Omega_t \setminus H^{(i,l)}}^{(i,l)}\|_p^p$   
 1053 with high probability to  $(1 \pm \epsilon^2)$  relative error. Each repetition requires  $O(|\Omega_t \setminus H^{(i,l)}|)$  additional  
 1054 time, and since  $|\Omega_t \setminus H^{(i,l)}||T| = o(\epsilon^4 n/r^3)$ , it follows that the total computational time is at most  
 1055 an additive  $o(n)$ , thus computing the  $\tilde{q}_i$ 's to error  $(1 \pm \epsilon^2)$  does not effect the overall runtime.

1056 □

## 1057 D Missing Proofs from Section 5

1058 We first give the proof of the main theorem. The proof relies on Lemma D.4, which the rest of this  
1059 section will be devoted to proving.

1060 **Theorem 5.1** *For any constant  $q \geq 2$ , there is an algorithm which runs in time  $O(\sum_{i=1}^q \text{nnz}(A_i) +$   
1061  $d \text{poly}(k/\epsilon))$  and outputs a rank  $k$ -matrix  $B$  in factored form such that  $\|B - A\|_F \leq (1 + \epsilon) \text{OPT}_k$   
1062 with probability  $9/10$ .*

1063 *Proof.* By Lemma D.4, we have  $(1 - \epsilon)\|A - AP\|_F^2 \leq \|M - MP\|_F^2 + c \leq (1 + \epsilon)\|A - AP\|_F^2$   
1064 for all rank  $k$  projection matrices  $P$ . In particular, we have

$$\min_P (1 + \epsilon)\|A - AP\|_F^2 + c = (1 + \epsilon) \text{OPT}_k^2$$

1065 where the minimum is taken over all rank  $k$  projection matrices. The minimizer  $P$  on the LHS is  
1066 given by the projection onto the top  $k$  singular space of  $M$ . Namely,  $MP = MU^\top U$  where  $U$  is the  
1067 top  $k$  singular row vectors of  $M$ . Thus  $\|M - MU^\top U\|_F^2 + c \leq (1 + \epsilon) \text{OPT}_k^2$ . Moreover, we have  
1068  $\|A - AU^\top U\|_F^2 \leq (1 + 2\epsilon)(\|M - MU^\top U\|_F^2 + c) \leq (1 + 4\epsilon) \text{OPT}_k^2$ . Thus  $\|A - AU^\top U\|_F \leq$   
1069  $(1 + O(\epsilon)) \text{OPT}_k$  as needed.

1070 For runtime, note that we first must compute  $M = (\otimes_{i=1}^q S_i)(A_1 \otimes A_2) = S_1 A_1 \otimes \cdots \otimes S_q A_q$ .  
1071 Now  $S_i A_i$  can be computed in  $O(\text{nnz}(A_i))$  time for each  $i$  [CW13]. Once all  $S_i A_i$  are computed,  
1072 their Kronecker product can be computed in time  $O(qk_1 k_2 \cdots k_q d) = \text{poly}(kd/\epsilon)$ . Given  $M \in$   
1073  $\mathbb{R}^{k_1 \cdots k_q \times d}$ , the top  $k$  singular vectors  $U$  can be computed by computing the SVD of  $M$ , which is  
1074 also done in time  $\text{poly}(kd/\epsilon)$ . Once  $U$  is obtained, the algorithm can terminate, which yields the  
1075 desired runtime.  $\square$

1076 To complete the proof of the main theorem, we will need to prove Lemma D.4. To do this, we begin  
1077 by introducing two definitions.

1078 **Definition D.1.** *A random matrix  $S$  is called a  $\epsilon$ -subspace embedding for a rank  $k$  subspace  $\mathcal{V}$  we*  
1079 *have simultaneously for all  $x \in \mathcal{V}$  that  $\|Sx\|_2 = (1 \pm \epsilon)\|x\|_2$ .*

1080 **Definition D.2.** *A random matrix  $S$  satisfies the  $\epsilon$ -approximate matrix product property if, for*  
1081 *any fixed matrices  $A, B$ , of the appropriate dimensions, we have  $\Pr[\|A^\top S^\top S B - A^\top B\|_F \leq$   
1082  $\epsilon\|A\|_F\|B\|_F] \geq 9/10$ .*

1083 We now show that  $S$  is both a subspace embedding and satisfies approximate matrix product, where  
1084  $S = \otimes_{i=1}^q S_i$  and  $S_i \in \mathbb{R}^{k_i \times n_i}$  are count-sketch matrices.

1085 **Lemma D.3.** *If  $S = (\otimes_{i=1}^q S_i)$  with  $S_i \in \mathbb{R}^{k_i \times n_i}$ ,  $k_1 = k_2 = \cdots = k_q = \Theta(qk^2/\epsilon^2)$ , then  $S$  is*  
1086 *an  $\epsilon$ -subspace embedding for any fixed  $k$  dimensional subspace  $\mathcal{V} \subset \mathbb{R}^n$  with probability  $9/10$ , and*  
1087 *also satisfies the  $(\epsilon/k)$ -approximate matrix product property.*

1088 *Proof.* We first show that  $S$  satisfies the  $O(\epsilon/k, 1/10, 2)$ -JL moment property. Here, the  $(\epsilon, \delta, \ell)$ -JL  
1089 moment property means that for any fixed  $x \in \mathbb{R}^n$  with  $\|x\|_2 = 1$ , we have  $\mathbb{E}[(\|Sx\|_2^2 - 1)^2] \leq \epsilon^\ell \delta$ ,  
1090 which will imply approximate matrix product by the results of [KN14].

1091 We prove this by induction on  $q$ . Let  $\bar{k} = k_1$ . First suppose  $S = (Q \otimes T)$ , where  $Q \in \mathbb{R}^{k_1 \times n_1}$  is a  
1092 count-sketch, and  $T \in \mathbb{R}^{k' \times n'}$  is any random matrix which satisfies  $\mathbb{E}[\|Tx\|_2^2] = \|x\|_2^2$  ( $T \in \mathbb{R}^{k' \times n'}$   
1093 is unbiased), and  $\mathbb{E}[(\|Tx\|_2 - 1)^2] \leq 1 + c/\bar{k}$  for some value  $c < \bar{k}$ . Note that both of these properties  
1094 are satisfied with  $c = 4$  if  $T \in \mathbb{R}^{k_2 \times n_2}$  is itself a count-sketch matrix [CW13]. Moreover, these are  
1095 the only properties we will need about  $T$ , so we will. We now prove that  $\mathbb{E}[\|(S \otimes T)x\|_2^2] = 1$  and  
1096  $\mathbb{E}[\|(S \otimes T)x\|_2^4] \leq 1 + (c + 4)/\bar{k}$  for any unit vector  $x$ .

1097 Fix any unit  $x \in \mathbb{R}^n$  now (here  $n = n_1 n'$ ), and let  $x^j \in \mathbb{R}^{n'}$  be the vector obtained by restricted  $x$  to  
1098 the coordinates  $j n_1 + 1$  to  $(j + 1)n_1$ . For any  $i \in [k_1]$ ,  $j \in [k']$ , let  $i_j = (i - 1)k' + j$ . Let  $h_Q(i) \in [k_1]$   
1099 denote the row where the non-zero entry in the  $i$ -th column is placed in  $Q$ . Let  $\sigma_Q(i) \in \{1, -1\}$

1100 denote the sign of the entry  $Q_{h_Q(i),i}$ . Let  $\delta_Q(i, j)$  indicate the event that  $h_Q(i) = j$ . First note that

$$\begin{aligned}
\mathbb{E} \left[ \sum_{i,j} ((Q \otimes T)x)_{i,j}^2 \right] &= \mathbb{E} \left[ \sum_{i=1}^{k_1} \sum_{j=1}^{k'} \left( \sum_{\tau=1}^{n_1} \delta_Q(\tau, i) \sigma_Q(\tau) (Tx^\tau)_j \right)^2 \right] \\
&= \mathbb{E} \left[ \sum_{i=1}^{k_1} \sum_{j=1}^{k'} \sum_{\tau=1}^{n_1} \delta_Q(\tau, i) (Tx^\tau)_j^2 \right] \\
&= \mathbb{E} \left[ \sum_{\tau=1}^{n_1} \sum_{i=1}^{k_1} \sum_{j=1}^{k'} \delta_Q(\tau, i) (Tx^\tau)_j^2 \right] \\
&= \mathbb{E} \left[ \sum_{\tau=1}^{n_1} \|Tx^\tau\|_2^2 \right] \\
&= \|x\|_2^2
\end{aligned}$$

1101 Where the last equality follows because count-sketch  $T$  is unbiased for the base case, namely that  
1102  $\mathbb{E}[\|Tx\|_2^2] = \|x\|_2^2$  for any  $x$  [Woo14], or by induction. We now compute the second moment,

$$\begin{aligned}
\mathbb{E} \left[ \left( \sum_{i,j} ((Q \otimes T)x)_{i,j}^2 \right)^2 \right] &= \mathbb{E} \left[ \left( \sum_{i,j} \left( \sum_{\tau=1}^{n_1} \delta_Q(\tau, i) \sigma_Q(\tau) (Tx^\tau)_j \right)^2 \right)^2 \right] \\
&= \mathbb{E} \left[ \left( \sum_{i,j} \sum_{\tau_1, \tau_2} \delta_Q(\tau_1, i) \sigma_Q(\tau_1) (Tx^{\tau_1})_j \delta_Q(\tau_2, i) \sigma_Q(\tau_2) (Tx^{\tau_2})_j \right)^2 \right] \\
&= \sum_{\tau_1, \tau_2, \tau_3, \tau_4} \mathbb{E} \left[ \left( \sum_{i,j} \delta_Q(\tau_1, i) \sigma_Q(\tau_1) (Tx^{\tau_1})_j \delta_Q(\tau_2, i) \sigma_Q(\tau_2) (Tx^{\tau_2})_j \right) \right. \\
&\quad \cdot \left. \left( \sum_{i,j} \delta_Q(\tau_3, i) \sigma_Q(\tau_3) (Tx^{\tau_3})_j \delta_Q(\tau_4, i) \sigma_Q(\tau_4) (Tx^{\tau_4})_j \right) \right].
\end{aligned}$$

1103 We now analyze the above expectation. There are several cases for the expectation of each term.

1104 First, we bound the sum of the expectations when  $t_1 = t_2 = t_3 = t_4$  by

$$\begin{aligned}
&\sum_{\tau=1}^{n_1} \mathbb{E} \left[ \left( \sum_{i,j} \delta_Q(\tau, i) \sigma_Q(\tau) (Tx^\tau)_j \delta_Q(\tau, i) \sigma_Q(\tau) (Tx^\tau)_j \right) \right. \\
&\quad \cdot \left. \left( \sum_{i,j} \delta_Q(\tau, i) \sigma_Q(\tau) (Tx^\tau)_j \delta_Q(\tau, i) \sigma_Q(\tau) (Tx^\tau)_j \right) \right] \\
&\leq \sum_{\tau=1}^{n_1} \mathbb{E} [\|Tx^\tau\|_2^4] = 1 + c/\bar{k}
\end{aligned}$$

1105 Where the last equation follows from the variance of count-sketch [CW13] for the base case, or by  
 1106 induction for  $q \geq 3$ . We now bound the sum of the expectations when  $t_1 = t_2 \neq t_3 = t_4$  by

$$\begin{aligned} & \sum_{\tau_1 \neq \tau_2} \mathbb{E} \left[ \left( \sum_{i,j} \delta_Q(\tau_1, i) \sigma_Q(\tau_1)(Tx^{\tau_1})_j \delta_Q(\tau_1, i) \sigma_Q(\tau_1)(Tx^{\tau_1})_j \right) \right. \\ & \quad \cdot \left. \left( \sum_{i,j} \delta_Q(\tau_2, i) \sigma_Q(\tau_2)(Tx^{\tau_2})_j \delta_Q(\tau_2, i) \sigma_Q(\tau_2)(Tx^{\tau_2})_j \right) \right] \\ & \leq \sum_{\tau_1 \neq \tau_2} \mathbb{E}[\|Tx^{\tau_1}\|_2^2 \|Tx^{\tau_2}\|_2^2 / k_1] \\ & \leq \mathbb{E}[\|Tx\|_2^4 / k_1] \leq (1 + c/\bar{k}) / k_1. \end{aligned}$$

We can similarly bound the sum of the terms with  $t_1 = t_3 \neq t_2 = t_4$  and  $t_1 = t_4 \neq t_3 = t_2$  by  $(1 + c/\bar{k}) / k_1$ , giving a total bound on the second moment of

$$\mathbb{E}[\|(Q \otimes T)x\|_2^4] \leq 1 + c/\bar{k} + 3(1 + c/\bar{k}) / k_1 \leq 1 + (4 + c)/\bar{k}$$

since any term with a  $t_i \notin \{t_1, t_2, t_3, t_4\} \setminus \{t_i\}$  immediately has expectation 0. By induction, it follows that  $\mathbb{E}[(\otimes_{i=1}^q S_i)x\|_2^2] = 1$  for any unit  $x$ , and  $\mathbb{E}[(\otimes_{i=1}^q S_i)x\|_2^4] \leq 1 + (4q + c)/\bar{k}$ , where  $c$  is the constant from the original variance of count-sketch. Setting  $\bar{k} = k_1 = \dots = k_q = \Theta(qk^2/\epsilon^2)$  with a large enough constant, this completes the proof that  $S = (\otimes_{i=1}^q S_i)$  has the  $O(\epsilon/k, 1/10, 2)$ -JL moment property. Then by Theorem 21 of [KN14], we obtain the approximate matrix product property:

$$\Pr[\|A^\top S^\top SB - A^\top B\|_F \leq O(\epsilon/k) \|A\|_F \|B\|_F] \geq 9/10$$

1107 for any two matrices  $A, B$ . Letting  $A = B^\top = U$  where  $U \in \mathbb{R}^{n \times k}$  is a orthogonal basis for any  
 1108  $k$ -dimensional subspace  $\mathcal{V} \subset \mathbb{R}^n$ , it follows that

$$\|U^\top S^\top SU - I_k\|_F \leq O(\epsilon/k) \|U\|_F^2 \leq O(\epsilon),$$

1109 where the last step follows because  $U$  is orthonormal, so  $\|U\|_F^2 = k$ . Since the Frobenius norm upper  
 1110 bounds the spectral norm  $\|\cdot\|_2$ , we have  $\|U^\top S^\top SU - I_k\|_2 \leq O(\epsilon)$ , from which it follows that all  
 1111 the eigenvalues of  $U^\top S^\top SU$  are in  $(1 - O(\epsilon), 1 + O(\epsilon))$ , which implies  $\|SUx\|_2 = (1 \pm O(\epsilon))\|x\|_2$   
 1112 for all  $x \in \mathbb{R}^n$ , so for any  $y \in \mathcal{V}$ , let  $x_y$  be such that  $y = Ux_y$ , and then  $\|Sy\|_2 = \|SUx_y\|_2 =$   
 1113  $(1 \pm O(\epsilon))\|x_y\|_2 = (1 \pm O(\epsilon))\|Ux_y\|_2 = (1 \pm O(\epsilon))\|y\|_2$ , which proves that  $S$  is a subspace  
 1114 embedding for  $\mathcal{V}$  (not the second to last inequality holds because  $U$  is orthonormal).  $\square$

1115 Finally, we are ready to prove Lemma D.4.

1116 **Lemma D.4.** Let  $S = (\otimes_{i=1}^q S_i)$  with  $S_i \in \mathbb{R}^{k_i \times n_i}$ ,  $k_1 = k_2 = \dots = k_q = \Theta(qk^2/\epsilon^2)$ . Then  
 1117 with probability 9/10  $SA$  is a Projection Cost Preserving Sketch (PCP) for  $A$ , namely for all rank  
 1118  $k$  orthogonal projection matrix  $P \in \mathbb{R}^{d \times d}$ ,

$$(1 - \epsilon) \|A - AP\|_F^2 \leq \|SA - SAP\|_F^2 + c \leq (1 + \epsilon) \|A - AP\|_F^2$$

1119 where  $c \geq 0$  is some fixed constant independent of  $P$  (but may depend on  $A$  and  $SA$ ).

1120 *Proof.* To demonstrate that  $SA$  is a PCP, we show that the conditions of Lemma 10 of [CEM<sup>+</sup>15]  
 1121 hold, which imply this result. Our result follows directly from Theorem 12 of [CEM<sup>+</sup>15]. Note  
 1122 that all that is needed (as discussed below the theorem) for the proof is that  $S$  is an  $\epsilon$ -subspace  
 1123 embedding for a fixed  $k$ -dimensional subspaces, and that  $S$  satisfies the  $(\epsilon/\sqrt{k})$  approximate matrix  
 1124 product property. By Lemma D.3, we have both  $\epsilon$ -subspace embedding for  $S$  as well as a stronger  
 1125  $(\epsilon/k)$  approximate matrix product property. Thus Theorem 12 holds for the random matrix  $S$  when  
 1126  $k_1 = k_2 = \dots = k_q = \Theta(qk^2/\epsilon^2)$ , which completes the proof.

1127  $\square$



## 1128 E Entry-wise Norm Low T-rank Approximation

1129 We now demonstrate our results for low trank approximation of arbitrary input matrices. Specifi-  
 1130 cally, we study the following problem, defined in [VL00]: given  $A \in \mathbb{R}^{n^2 \times n^2}$ , the goal is to output  
 1131 a trank- $k$  matrix  $B \in \mathbb{R}^{n^2 \times n^2}$  such that

$$\|B - A\|_\xi \leq \alpha \cdot \text{OPT}. \quad (1)$$

1132 for some  $\alpha \geq 1$ , where  $\text{OPT} = \min_{\text{trank}-k A'} \|A' - A\|_\xi$ , where the trank of a matrix  $B$  is  
 1133 defined as the smallest integer  $k$  such that  $B$  can be written as a summation of  $k$  matrices, where  
 1134 each matrix is the Kronecker product of  $q$  matrices with dimensions  $n \times n$ :  $B = \sum_{i=1}^k U_i \otimes V_i$ ,  
 1135 where  $U_i, V_i \in \mathbb{R}^{n \times n}$ .

1136 Using Lemma B.2, we can rearrange the entries in  $A \in \mathbb{R}^{n^2 \times n^2}$  to obtain  $\bar{A} \in \mathbb{R}^{n^2 \times n^2}$ , where the  
 1137  $(i + n(j - 1))$ 'th row of  $\bar{A}$  is equal to  $\text{vec}((A_1)_{i,j} A_2)$ , and also vectorize the matrix  $U_i \in \mathbb{R}^{n \times n}$  and  
 1138  $V_i \in \mathbb{R}^{n \times n}$  to obtain vectors  $u_i \in \mathbb{R}^{n^2}$ ,  $v_i \in \mathbb{R}^{n^2}$ . Therefore, for any entry-wise norm  $\xi$  we have

$$\left\| \sum_{i=1}^k U_i \otimes V_i - A \right\|_\xi = \left\| \sum_{i=1}^k u_i v_i^\top - \bar{A} \right\|_\xi$$

1139 **Lemma E.1** (Reshaping for Low Rank Approximation). *There is a one-to-one mapping  $\pi : [n] \times$   
 1140  $[n] \times [n] \times [n] \rightarrow [n^2] \times [n^2]$  such that for any pairs  $(U, u) \in \mathbb{R}^{n \times n} \times \mathbb{R}^{n^2}$  and  $(V, v) \in \mathbb{R}^{n \times n} \times \mathbb{R}^{n^2}$ ,  
 1141 if  $U_{i_1, j_1} = u_{i_1 + n(j_1 - 1)}$  and  $V_{i_2, j_2} = v_{i_2 + n(j_2 - 1)}$ , then we have for  $i_1, i_2, j_1, j_2$*

$$(U \otimes V)_{i_1 + n(i_2 - 1), j_1 + n(j_2 - 1)} = (u \cdot v^\top)_{\pi(i_1, i_2, j_1, j_2)}$$

1142 where  $U \otimes V \in \mathbb{R}^{n^2 \times n^2}$  and  $uv^\top \in \mathbb{R}^{n^2 \times n^2}$ .

1143 *Proof.* We have

$$\begin{aligned} (U \otimes V)_{i_1 + n(i_2 - 1), j_1 + n(j_2 - 1)} &= U_{i_1, j_1} V_{i_2, j_2} \\ &= u_{i_1 + n(j_1 - 1)} \cdot v_{i_2 + n(j_2 - 1)} \\ &= (uv^\top)_{i_1 + n(j_1 - 1), i_2 + n(j_2 - 1)} \end{aligned}$$

1144 where the first step follows from the definition of  $\otimes$  product, the second step follows from the  
 1145 connection between  $U, V$  and  $u, v$ , the last step follows from the outer product.  $\square$

1146 Therefore, instead of using trank to define low-rank approximation of the  $\otimes$  product of two matrices,  
 1147 we can just use the standard notion of rank to define it since both  $B$  and  $A'$  can be rearranged to  
 1148 have rank  $k$ .

1149 **Definition E.2** (Based on Standard Notion of Rank). *Given two matrices  $A_1, A_2 \in \mathbb{R}^{n \times n}$ , let  $\bar{A} \in$   
 1150  $\mathbb{R}^{n^2 \times n^2}$  denote the re-shaping of  $A_1 \otimes A_2$ . The goal is to output a rank- $k$  matrix  $\bar{B}$  such that*

$$\|\bar{B} - \bar{A}\|_\xi \leq \alpha \text{OPT}_{\xi, k}$$

1151 where  $\text{OPT}_{\xi, k} = \min_{\text{rank}-k \bar{A}'} \|\bar{A}' - \bar{A}\|_\xi$ .

1152 In other words,  $\bar{B}$  can be written as  $\bar{B} = \sum_{i=1}^k u_i v_i^\top$  where  $u_i, v_i$  are length  $n^2$  vectors.

1153 Combining the low-rank reshaping Lemma E.1 with the main input-sparsity low-rank approximation  
 1154 of [CW13], we obtain our Frobenius norm low rank approximation result.

1155 **Theorem E.3** (Frobenius norm low rank approximation,  $p = 2$ ). *For any  $\epsilon \in (0, 1/2)$ , there is  
 1156 an algorithm that runs in  $n^2 \text{poly}(k/\epsilon)$  and outputs a rank- $k$  matrix  $\bar{B}$  such that  $\|\bar{B} - \bar{A}\|_F \leq$   
 1157  $(1 + \epsilon) \text{OPT}_{F, k}$  holds with probability at least  $9/10$ , where  $\text{OPT}_p$  is cost achieved by best rank- $k$   
 1158 solution under the  $\ell_p$ -norm.*

1159 Similarly, using the main  $\ell_p$  low rank approximation algorithm of [SWZ17], we have

1160 **Theorem E.4** (Entry-wise  $\ell_p$ -norm low rank approximation,  $1 \leq p \leq 2$ ). *There is an algorithm that  
 1161 runs in  $n^2 \text{poly}(k)$  and outputs a rank- $k$  matrix  $\bar{B}$  such that  $\|\bar{B} - \bar{A}\|_p \leq \text{poly}(k \log n) \text{OPT}_{p, k}$   
 1162 holds with probability at least  $9/10$ , where  $\text{OPT}_p$  is cost achieved by best rank- $k$  solution under the  
 1163  $\ell_p$ -norm.*

1164 Applying the bi-criteria algorithm of [CGK<sup>+</sup>17] gives us:

1165 **Theorem E.5** (General  $p > 1$ , bicriteria algorithm). *There is an algorithm that runs in  $\text{poly}(n, k)$*   
 1166 *and outputs a rank- $\text{poly}(k \log n)$  matrix  $\bar{B}$  such that  $\|\bar{B} - \bar{A}\|_p \leq \text{poly}(k \log n) \text{OPT}_p$  holds with*  
 1167 *probability at least  $9/10$ , where  $\text{OPT}_{p,k}$  is cost achieved by best rank- $k$  solution under the  $\ell_p$ -norm.*

1168 Finally using the low-rank approximation algorithm for general loss functions given in [SWZ18],  
 1169 we obtain a very general result. The parameters for the loss function described in the following  
 1170 theorem are discussed in Section F.

1171 **Theorem E.6** (General loss function  $g$ ). *For any function  $g$  that satisfies Definition F.1, F.2, F.3,*  
 1172 *there is an algorithm that runs in  $O(n^2 \cdot T_{\text{reg},g,n^2,k,n^2})$  time and outputs a rank- $O(k \log n)$  matrix*  
 1173  *$\bar{B} \in \mathbb{R}^{n^2 \times n^2}$  such that*

$$\|\bar{B} - \bar{A}\|_g \leq \text{ati}_{g,k} \cdot \text{mon}_g \cdot \text{reg}_{g,k} \cdot O(k \log k) \cdot \text{OPT}_{g,k},$$

1174 holds with probability  $1 - 1/\text{poly}(n)$ .

1175 Hence, overall, the strategy is to first reshape  $A = A_1 \otimes A_2$  into  $\bar{A}$ , then compute  $\bar{B} = \sum_{i=1}^k u_i v_i^\top$   
 1176 using any of the above three theorems depending on the desired norm, and finally reshape  $u_i$  and  
 1177  $v_i$  back to  $U_i \in \mathbb{R}^{n \times n}$  and  $V_i \in \mathbb{R}^{n \times n}$ . It is easy to verify that the guarantees from Theo-  
 1178 rems E.6, E.4, E.3 are directly transferable to the guarantee of the trunk- $k$  approximation shown  
 1179 in Eq 1.

## 1180 F Properties for General Loss Functions for Low rank Approximation

1181 We re-state three general properties (defined in [SWZ18]), the first two of which are structural  
 1182 properties and are necessary and sufficient for obtaining a good approximation from a small subset  
 1183 of columns. The third property is needed for efficient running time.

1184 **Definition F.1** (Approximate triangle inequality). *For any positive integer  $n$ , we say a function*  
 1185  *$g(x) : \mathbb{R} \rightarrow \mathbb{R}_{\geq 0}$  satisfies the  $\text{ati}_{g,n}$ -approximate triangle inequality if for any  $x_1, x_2, \dots, x_n \in \mathbb{R}$*   
 1186 *we have*

$$g\left(\sum_{i=1}^n x_i\right) \leq \text{ati}_{g,n} \cdot \sum_{i=1}^n g(x_i).$$

1187 **Definition F.2** (Monotone property). *For any parameter  $\text{mon}_g \geq 1$ , we say function  $g(x) : \mathbb{R} \rightarrow$*   
 1188  *$\mathbb{R}_{\geq 0}$  is  $\text{mon}_g$ -monotone if for any  $x, y \in \mathbb{R}$  with  $0 \leq |x| \leq |y|$ , we have  $g(x) \leq \text{mon}_g \cdot g(y)$ .*

1189 **Definition F.3** (Regression property). *We say function  $g(x) : \mathbb{R} \rightarrow \mathbb{R}_{\geq 0}$  has the*  
 1190  *$(\text{reg}_{g,d}, T_{\text{reg},g,n,d,m})$ -regression property if the following holds: given two matrices  $A \in \mathbb{R}^{n \times d}$*   
 1191 *and  $B \in \mathbb{R}^{n \times m}$ , for each  $i \in [m]$ , let  $\text{OPT}_i$  denote  $\min_{x \in \mathbb{R}^d} \|Ax - B_i\|_g$ . There is an algorithm*  
 1192 *that runs in  $T_{\text{reg},g,n,d,m}$  time and outputs a matrix  $X' \in \mathbb{R}^{d \times m}$  such that*

$$\|AX'_i - B\|_g \leq \text{reg}_{g,d} \cdot \text{OPT}_i, \forall i \in [m]$$

1193 and outputs a vector  $v \in \mathbb{R}^d$  such that

$$\text{OPT}_i \leq v_i \leq \text{reg}_{g,d} \cdot \text{OPT}_i, \forall i \in [m].$$

1194 The success probability is at least  $1 - 1/\text{poly}(nm)$ .
